# Supplementary material for: Mechanism of epoxide hydrolysis in microsolvated nucleotide bases adenine, guanine and cytosine: A DFT study
Source: Royal Society of Chemistry journal article supplement (doi:10.1039/c1ob05093a), 2011-01-01

Supporting Information For:

**Mechanism of Epoxide Hydrolysis in Microsolvated Nucleotide  
Bases Adenine, Guanine and Cytosine: A DFT Study**

*Kunduchi P. Vijayalakshmi, Neetha Mohan, Manjaly J. Ajitha, and Cherumuttathu H. Suresh\**

Computational Modeling and Simulation Section,  
National Institute for Interdisciplinary Science and Technology (CSIR), Trivandrum, India

*E-mail:sureshch@gmail.com*

| Contents                                                                                                                                                                                                                                                                                          | Page no. |
|---------------------------------------------------------------------------------------------------------------------------------------------------------------------------------------------------------------------------------------------------------------------------------------------------|----------|
| <b>Table S1.</b> Cartesian coordinates of all the optimized geometries (in Å), SCF energy (in a.u) and number of imaginary frequencies ( $N_{\text{img}}$ ) computed at MPWB1K /6-31++G(d,p) level of theory.                                                                                     | S3       |
| <b>Table S2.</b> Zero-point energy (ZPE) corrected SCF energies ( $E+\text{ZPE}$ ), enthalpies (H), free energies (G), ZPE and thermal correction to Gibb's free energy ( $G_{\text{corr}}$ ) computed at MPWB1K /6-31++G(d,p) level of theory. All the energies are given in atomic units (a.u). | S31      |
| <b>Table S3.</b> Single point SCF energies (in a.u) of MPWB1K/6-31+G(d,p) optimized geometries at seven different DFT functionals using 6-311++G(3df,2p) basis set.                                                                                                                               | S32      |
| <b>Table S4.</b> Zero-point-energy (ZPE) corrected activation energies ( $E_{\text{act}}$ ) are given with respect to the pre- reactant complex at seven different DFT functionals using 6-311++G(3df,2p) basis set (kcal/mol).                                                                   | S33      |
| <b>Table S5.</b> Single point MPWB1K-PCM/6-311++G(3df,2p) ZPE corrected SCF energies (in a.u) of MPWB1K/6-31+G(d,p) optimized geometries of reactants, intermediates and transition states of <b>EAw</b> , <b>EGw</b> and <b>ECw</b> systems.                                                     | S34      |
| <b>Figure S1.</b> Relative energy ( $E_{\text{act}}$ ) profiles at seven different DFT functionals using 6-311++G(3df,2p) basis set (kcal/mol).                                                                                                                                                   | S35      |

**Table S1.** Cartesian coordinates of all the optimized geometries (in Å), SCF energy (in a.u) and number of imaginary frequencies ( $N_{\text{img}}$ ) computed at MPWB1K /6-31++G(d,p) level of theory.

| <b>EAw</b>    |              |              |              |
|---------------|--------------|--------------|--------------|
| <b>At. No</b> | <b>X</b>     | <b>Y</b>     | <b>Z</b>     |
| 6             | 1.588937000  | 0.006011000  | -0.670396000 |
| 6             | 2.644278000  | -0.188926000 | 0.300003000  |
| 8             | 2.946009000  | -0.127297000 | -1.100522000 |
| 1             | 1.167957000  | 0.991772000  | -0.805557000 |
| 1             | 0.959084000  | -0.829612000 | -0.939854000 |
| 1             | 2.997562000  | 0.658933000  | 0.867915000  |
| 1             | 2.781580000  | -1.161566000 | 0.746615000  |
| 8             | 3.831005000  | 2.460863000  | -1.498581000 |
| 1             | 3.642581000  | 1.511644000  | -1.500882000 |
| 1             | 3.935044000  | 2.732002000  | -2.406220000 |
| 8             | 2.486904000  | -2.800454000 | -1.735890000 |
| 1             | 3.137795000  | -3.425394000 | -2.042174000 |
| 1             | 2.910181000  | -1.935166000 | -1.694642000 |
| 8             | 2.190360000  | 3.776446000  | 0.312093000  |
| 1             | 2.776889000  | 3.374577000  | -0.344853000 |
| 1             | 2.723273000  | 4.380163000  | 0.821775000  |
| 8             | 0.796928000  | -3.439215000 | 0.475266000  |
| 1             | 1.317284000  | -3.293885000 | -0.322121000 |
| 1             | -0.051841000 | -2.980192000 | 0.368688000  |
| 7             | -3.847884000 | 1.102587000  | -1.129702000 |
| 6             | -3.293940000 | 2.155430000  | -0.470588000 |
| 7             | -2.319381000 | 1.808631000  | 0.311020000  |
| 6             | -2.223290000 | 0.447814000  | 0.157628000  |
| 6             | -1.386773000 | -0.526303000 | 0.742661000  |
| 7             | -0.468033000 | -0.243528000 | 1.651692000  |
| 7             | -1.552988000 | -1.792832000 | 0.325595000  |
| 6             | -2.509673000 | -2.079825000 | -0.554738000 |
| 7             | -3.366930000 | -1.265390000 | -1.132657000 |
| 6             | -3.168251000 | -0.010809000 | -0.739896000 |
| 8             | 1.521762000  | -2.177167000 | 2.712004000  |
| 8             | 0.069022000  | 2.587186000  | 1.778773000  |
| 1             | -4.611009000 | 1.124375000  | -1.777575000 |
| 1             | -3.649192000 | 3.160748000  | -0.606082000 |
| 1             | -0.242367000 | 0.722787000  | 1.863229000  |
| 1             | 0.112010000  | -0.972057000 | 2.046770000  |
| 1             | -2.582076000 | -3.122554000 | -0.829600000 |
| 1             | 1.449328000  | -2.669731000 | 3.524108000  |

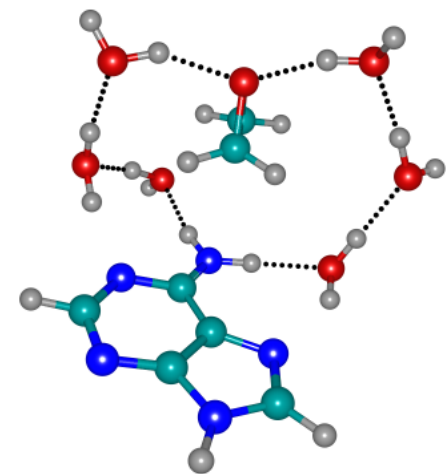

The image shows a 3D ball-and-stick model of a complex organic molecule. The structure features a central ring system with various substituents. Dotted lines indicate hydrogen bonding interactions between several atoms, forming a network of interactions. The atoms are color-coded: carbon (grey), oxygen (red), nitrogen (blue), and hydrogen (white).

|                                 |              |              |              |                      |
|---------------------------------|--------------|--------------|--------------|----------------------|
| 1                               | 1.364780000  | -2.799309000 | 1.977425000  |                      |
| 1                               | -0.745804000 | 2.713417000  | 1.283048000  |                      |
| 1                               | 0.780634000  | 2.994771000  | 1.271969000  |                      |
| E(RmPW+HF-B95) = -1079.32431120 |              |              |              | N <sub>img</sub> = 0 |
| <b>EAW-TS1</b>                  |              |              |              |                      |
| <b>At. No</b>                   | <b>X</b>     | <b>Y</b>     | <b>Z</b>     |                      |
| 6                               | 1.365374000  | -0.066824000 | -0.304257000 |                      |
| 6                               | 2.678434000  | -0.249109000 | 0.304671000  |                      |
| 8                               | 3.117510000  | -0.173391000 | -1.010506000 |                      |
| 1                               | 1.122515000  | 0.924554000  | -0.649309000 |                      |
| 1                               | 0.964511000  | -0.902247000 | -0.853142000 |                      |
| 1                               | 3.011806000  | 0.566265000  | 0.945857000  |                      |
| 1                               | 2.841277000  | -1.210887000 | 0.787281000  |                      |
| 8                               | 3.747817000  | 2.320444000  | -1.407539000 |                      |
| 1                               | 3.579665000  | 1.345667000  | -1.332132000 |                      |
| 1                               | 3.804613000  | 2.527974000  | -2.335145000 |                      |
| 8                               | 2.664094000  | -2.675043000 | -1.669657000 |                      |
| 1                               | 3.401994000  | -3.187175000 | -1.985902000 |                      |
| 1                               | 2.972811000  | -1.745822000 | -1.549984000 |                      |
| 8                               | 2.283393000  | 3.724201000  | 0.361944000  |                      |
| 1                               | 2.814936000  | 3.259212000  | -0.312951000 |                      |
| 1                               | 2.898550000  | 4.217507000  | 0.896902000  |                      |
| 8                               | 0.979472000  | -3.471447000 | 0.386424000  |                      |
| 1                               | 1.594170000  | -3.297733000 | -0.344289000 |                      |
| 1                               | 0.139840000  | -3.060197000 | 0.156883000  |                      |
| 7                               | -4.107221000 | 1.051163000  | -0.874262000 |                      |
| 6                               | -3.454590000 | 2.137390000  | -0.378857000 |                      |
| 7                               | -2.320043000 | 1.849094000  | 0.176537000  |                      |
| 6                               | -2.211316000 | 0.487978000  | 0.038958000  |                      |
| 6                               | -1.252142000 | -0.447246000 | 0.430131000  |                      |
| 7                               | -0.073291000 | -0.109296000 | 1.044233000  |                      |
| 7                               | -1.453185000 | -1.724644000 | 0.123610000  |                      |
| 6                               | -2.569713000 | -2.077534000 | -0.512689000 |                      |
| 7                               | -3.552274000 | -1.296815000 | -0.913126000 |                      |
| 6                               | -3.322402000 | -0.028919000 | -0.617346000 |                      |
| 8                               | 1.202940000  | -2.082132000 | 2.646402000  |                      |
| 8                               | 0.116498000  | 2.603566000  | 1.640536000  |                      |
| 1                               | -4.993590000 | 1.035584000  | -1.340824000 |                      |
| 1                               | -3.867175000 | 3.127150000  | -0.456026000 |                      |
| 1                               | -0.028043000 | 0.848375000  | 1.417323000  |                      |
| 1                               | 0.284631000  | -0.819585000 | 1.690426000  |                      |
| 1                               | -2.674025000 | -3.131097000 | -0.723999000 |                      |
| 1                               | 0.942177000  | -2.531065000 | 3.444996000  |                      |
| 1                               | 1.242671000  | -2.745956000 | 1.930677000  |                      |
| 1                               | -0.676915000 | 2.854557000  | 1.163782000  |                      |

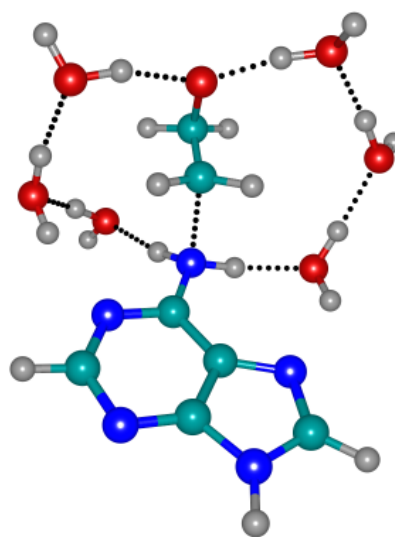

|                                 |              |              |              |                      |
|---------------------------------|--------------|--------------|--------------|----------------------|
| 1                               | 0.870018000  | 3.034411000  | 1.206134000  |                      |
| E(RmPW+HF-B95) = -1079.28280038 |              |              |              | N <sub>img</sub> = 1 |
| <b>EAw-1</b>                    |              |              |              |                      |
| <b>At. No</b>                   | <b>X</b>     | <b>Y</b>     | <b>Z</b>     |                      |
| 6                               | 1.140200000  | -0.119661000 | -0.337385000 |                      |
| 6                               | 2.541137000  | -0.128703000 | 0.259938000  |                      |
| 8                               | 3.433861000  | -0.225564000 | -0.765455000 |                      |
| 1                               | 1.001201000  | 0.756892000  | -0.965112000 |                      |
| 1                               | 0.986424000  | -1.016409000 | -0.927448000 |                      |
| 1                               | 2.676022000  | 0.784488000  | 0.858344000  |                      |
| 1                               | 2.609707000  | -0.971807000 | 0.960834000  |                      |
| 8                               | 3.591182000  | 2.148564000  | -1.480905000 |                      |
| 1                               | 3.606203000  | 1.141696000  | -1.253553000 |                      |
| 1                               | 3.634179000  | 2.238960000  | -2.427153000 |                      |
| 8                               | 3.186749000  | -2.670207000 | -1.268853000 |                      |
| 1                               | 4.023225000  | -3.124563000 | -1.294865000 |                      |
| 1                               | 3.381528000  | -1.673652000 | -1.139339000 |                      |
| 8                               | 2.220966000  | 3.658557000  | 0.157857000  |                      |
| 1                               | 2.721742000  | 3.116489000  | -0.501011000 |                      |
| 1                               | 2.875689000  | 4.153753000  | 0.641991000  |                      |
| 8                               | 1.210178000  | -3.500422000 | 0.294133000  |                      |
| 1                               | 1.987695000  | -3.267312000 | -0.266421000 |                      |
| 1                               | 0.431519000  | -3.269554000 | -0.210682000 |                      |
| 7                               | -4.248453000 | 1.133047000  | -0.492304000 |                      |
| 6                               | -3.551937000 | 2.184057000  | 0.019208000  |                      |
| 7                               | -2.343831000 | 1.885528000  | 0.379068000  |                      |
| 6                               | -2.225859000 | 0.551453000  | 0.087543000  |                      |
| 6                               | -1.218057000 | -0.389332000 | 0.211071000  |                      |
| 7                               | 0.078438000  | -0.083834000 | 0.726441000  |                      |
| 7                               | -1.419999000 | -1.630984000 | -0.172691000 |                      |
| 6                               | -2.607296000 | -1.964440000 | -0.675275000 |                      |
| 7                               | -3.649780000 | -1.173957000 | -0.849651000 |                      |
| 6                               | -3.414914000 | 0.060696000  | -0.460368000 |                      |
| 8                               | 0.786223000  | -2.066127000 | 2.453389000  |                      |
| 8                               | 0.275567000  | 2.455818000  | 1.529796000  |                      |
| 1                               | -5.191394000 | 1.137080000  | -0.832024000 |                      |
| 1                               | -3.991004000 | 3.161979000  | 0.103854000  |                      |
| 1                               | 0.114294000  | 0.883562000  | 1.147742000  |                      |
| 1                               | 0.316261000  | -0.791897000 | 1.461262000  |                      |
| 1                               | -2.725347000 | -2.995054000 | -0.971397000 |                      |
| 1                               | 0.312697000  | -2.520479000 | 3.143880000  |                      |
| 1                               | 1.025321000  | -2.723281000 | 1.760286000  |                      |
| 1                               | -0.548557000 | 2.838202000  | 1.226120000  |                      |
| 1                               | 1.006073000  | 2.919472000  | 1.065089000  |                      |
| E(RmPW+HF-B95) = -1079.31007753 |              |              |              | N <sub>img</sub> = 0 |

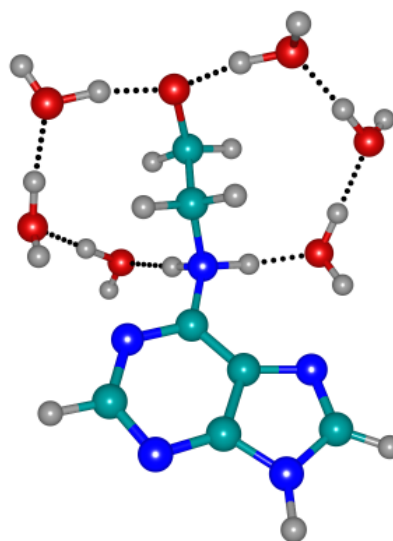

**EAW-TS2**

| At. No | X            | Y            | Z            |
|--------|--------------|--------------|--------------|
| 6      | 1.210451000  | 0.056554000  | -0.267410000 |
| 6      | 2.560116000  | 0.215610000  | 0.414572000  |
| 8      | 3.533117000  | 0.274105000  | -0.560984000 |
| 1      | 1.011526000  | 0.915423000  | -0.903440000 |
| 1      | 1.200175000  | -0.847798000 | -0.865773000 |
| 1      | 2.548252000  | 1.117873000  | 1.035726000  |
| 1      | 2.734291000  | -0.635154000 | 1.077061000  |
| 8      | 2.828012000  | 2.311932000  | -1.578252000 |
| 1      | 3.315804000  | 1.235744000  | -1.121869000 |
| 1      | 3.318085000  | 2.693422000  | -2.299384000 |
| 8      | 3.406654000  | -2.222613000 | -1.266819000 |
| 1      | 4.245482000  | -2.625921000 | -1.468333000 |
| 1      | 3.572534000  | -1.256099000 | -1.103900000 |
| 8      | 1.740266000  | 3.768540000  | 0.134865000  |
| 1      | 2.209103000  | 3.225629000  | -0.602532000 |
| 1      | 2.421701000  | 4.238384000  | 0.606494000  |
| 8      | 1.540120000  | -3.283498000 | 0.394736000  |
| 1      | 2.274956000  | -2.988189000 | -0.177279000 |
| 1      | 0.730768000  | -3.051298000 | -0.063227000 |
| 7      | -4.301131000 | 0.572811000  | -0.623113000 |
| 6      | -3.780239000 | 1.700972000  | -0.067077000 |
| 7      | -2.556867000 | 1.569451000  | 0.336699000  |
| 6      | -2.239294000 | 0.272679000  | 0.027972000  |
| 6      | -1.112754000 | -0.516661000 | 0.174331000  |
| 7      | 0.107259000  | -0.036463000 | 0.742877000  |
| 7      | -1.123832000 | -1.768149000 | -0.231964000 |
| 6      | -2.232542000 | -2.257610000 | -0.784637000 |
| 7      | -3.368138000 | -1.618411000 | -0.989697000 |
| 6      | -3.325776000 | -0.370679000 | -0.574187000 |

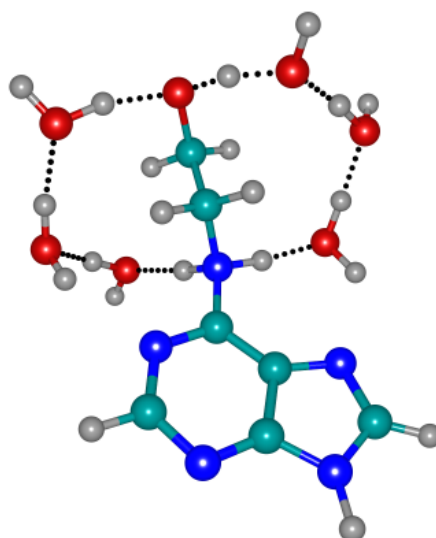

|                                                           |              |              |              |  |
|-----------------------------------------------------------|--------------|--------------|--------------|--|
| 8                                                         | 1.005489000  | -1.884873000 | 2.563120000  |  |
| 8                                                         | -0.017370000 | 2.465309000  | 1.521442000  |  |
| 1                                                         | -5.220939000 | 0.451351000  | -1.002241000 |  |
| 1                                                         | -4.356979000 | 2.604828000  | 0.015001000  |  |
| 1                                                         | -0.001482000 | 0.948586000  | 1.145559000  |  |
| 1                                                         | 0.394516000  | -0.688084000 | 1.505161000  |  |
| 1                                                         | -2.191848000 | -3.289041000 | -1.097975000 |  |
| 1                                                         | 0.629689000  | -2.354763000 | 3.301493000  |  |
| 1                                                         | 1.311672000  | -2.538817000 | 1.899115000  |  |
| 1                                                         | -0.880707000 | 2.771845000  | 1.243423000  |  |
| 1                                                         | 0.662284000  | 3.001006000  | 1.027059000  |  |
| E(RmPW+HF-B95) = -1079.30810832      N <sub>img</sub> = 1 |              |              |              |  |
| <b>EAw-2</b>                                              |              |              |              |  |
| <b>At. No</b>                                             | <b>X</b>     | <b>Y</b>     | <b>Z</b>     |  |
| 6                                                         | 1.226075000  | 0.057573000  | -0.286311000 |  |
| 6                                                         | 2.568500000  | 0.210788000  | 0.407116000  |  |
| 8                                                         | 3.560260000  | 0.261411000  | -0.559892000 |  |
| 1                                                         | 1.045151000  | 0.916893000  | -0.927710000 |  |
| 1                                                         | 1.212406000  | -0.849425000 | -0.880697000 |  |
| 1                                                         | 2.560948000  | 1.115032000  | 1.021909000  |  |
| 1                                                         | 2.745314000  | -0.640721000 | 1.064792000  |  |
| 8                                                         | 2.766614000  | 2.341208000  | -1.552434000 |  |
| 1                                                         | 3.368149000  | 1.150822000  | -1.087785000 |  |
| 1                                                         | 3.147592000  | 2.772161000  | -2.310713000 |  |
| 8                                                         | 3.400045000  | -2.270813000 | -1.277039000 |  |
| 1                                                         | 4.222811000  | -2.692642000 | -1.505500000 |  |
| 1                                                         | 3.589298000  | -1.314858000 | -1.131783000 |  |
| 8                                                         | 1.727149000  | 3.739246000  | 0.158996000  |  |
| 1                                                         | 2.202701000  | 3.184237000  | -0.617703000 |  |
| 1                                                         | 2.405052000  | 4.218008000  | 0.626507000  |  |
| 8                                                         | 1.506799000  | -3.290006000 | 0.415877000  |  |

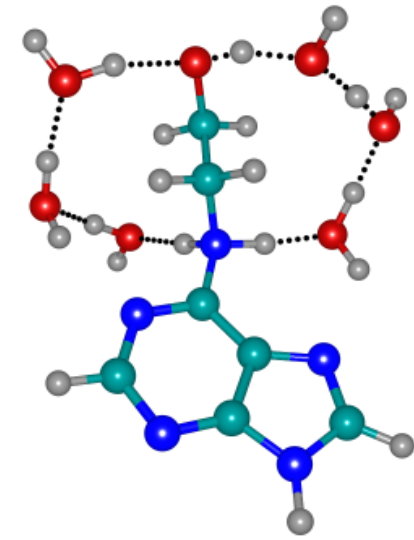

|                                                           |              |              |              |
|-----------------------------------------------------------|--------------|--------------|--------------|
| 1                                                         | 2.245870000  | -3.016829000 | -0.157025000 |
| 1                                                         | 0.702459000  | -3.031585000 | -0.038244000 |
| 7                                                         | -4.296654000 | 0.568897000  | -0.624290000 |
| 6                                                         | -3.778317000 | 1.698763000  | -0.068597000 |
| 7                                                         | -2.552554000 | 1.572773000  | 0.328803000  |
| 6                                                         | -2.229940000 | 0.278260000  | 0.016071000  |
| 6                                                         | -1.098486000 | -0.505049000 | 0.155358000  |
| 7                                                         | 0.121010000  | -0.019089000 | 0.719789000  |
| 7                                                         | -1.106904000 | -1.756900000 | -0.251616000 |
| 6                                                         | -2.215971000 | -2.251400000 | -0.799016000 |
| 7                                                         | -3.355251000 | -1.617215000 | -0.998276000 |
| 6                                                         | -3.316581000 | -0.369748000 | -0.581521000 |
| 8                                                         | 1.008288000  | -1.855439000 | 2.574379000  |
| 8                                                         | 0.007267000  | 2.446605000  | 1.512146000  |
| 1                                                         | -5.217763000 | 0.443464000  | -0.998859000 |
| 1                                                         | -4.359219000 | 2.599540000  | 0.018043000  |
| 1                                                         | 0.014398000  | 0.982164000  | 1.116468000  |
| 1                                                         | 0.402203000  | -0.659249000 | 1.491270000  |
| 1                                                         | -2.172032000 | -3.282525000 | -1.112968000 |
| 1                                                         | 0.660310000  | -2.296340000 | 3.343526000  |
| 1                                                         | 1.296252000  | -2.531264000 | 1.926374000  |
| 1                                                         | -0.855439000 | 2.773018000  | 1.256539000  |
| 1                                                         | 0.696058000  | 2.994082000  | 1.016607000  |
| E(RmPW+HF-B95) = -1079.30828542      N <sub>img</sub> = 0 |              |              |              |
| <b>EAW-TS3</b>                                            |              |              |              |
| <b>At. No</b>                                             | <b>X</b>     | <b>Y</b>     | <b>Z</b>     |
| 6                                                         | 1.219705000  | 0.067570000  | -0.306639000 |
| 6                                                         | 2.566412000  | 0.224551000  | 0.376344000  |
| 8                                                         | 3.556244000  | 0.267847000  | -0.597126000 |
| 1                                                         | 1.035205000  | 0.924659000  | -0.950175000 |
| 1                                                         | 1.201897000  | -0.842016000 | -0.897516000 |



|   |              |              |              |
|---|--------------|--------------|--------------|
| 1 | 2.564757000  | 1.133674000  | 0.982396000  |
| 1 | 2.750782000  | -0.623063000 | 1.035737000  |
| 8 | 2.742871000  | 2.391763000  | -1.552579000 |
| 1 | 3.380678000  | 1.144894000  | -1.108722000 |
| 1 | 3.091344000  | 2.866762000  | -2.300045000 |
| 8 | 3.390011000  | -2.284317000 | -1.292358000 |
| 1 | 4.206468000  | -2.713763000 | -1.529270000 |
| 1 | 3.586376000  | -1.330388000 | -1.163789000 |
| 8 | 1.721601000  | 3.714315000  | 0.179533000  |
| 1 | 2.217463000  | 3.159023000  | -0.644570000 |
| 1 | 2.386084000  | 4.192162000  | 0.666833000  |
| 8 | 1.507649000  | -3.279062000 | 0.442622000  |
| 1 | 2.239867000  | -3.017356000 | -0.142498000 |
| 1 | 0.698854000  | -3.017540000 | -0.002252000 |
| 7 | -4.307007000 | 0.544128000  | -0.605727000 |
| 6 | -3.789163000 | 1.684938000  | -0.071944000 |
| 7 | -2.559376000 | 1.570946000  | 0.316059000  |
| 6 | -2.232988000 | 0.273339000  | 0.020273000  |
| 6 | -1.095801000 | -0.501643000 | 0.161771000  |
| 7 | 0.124673000  | -0.000317000 | 0.708483000  |
| 7 | -1.102663000 | -1.759940000 | -0.226586000 |
| 6 | -2.214157000 | -2.268177000 | -0.756098000 |
| 7 | -3.358377000 | -1.642783000 | -0.954769000 |
| 6 | -3.321866000 | -0.388863000 | -0.557493000 |
| 8 | 1.035207000  | -1.814573000 | 2.593572000  |
| 8 | 0.011802000  | 2.438751000  | 1.484419000  |
| 1 | -5.230952000 | 0.408288000  | -0.969429000 |
| 1 | -4.373769000 | 2.584094000  | 0.006345000  |
| 1 | 0.018048000  | 1.020454000  | 1.098125000  |
| 1 | 0.414401000  | -0.626275000 | 1.485785000  |
| 1 | -2.167967000 | -3.303884000 | -1.054358000 |

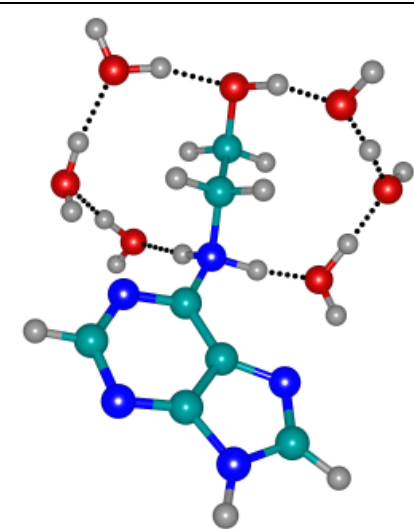

|                                 |              |              |              |                      |
|---------------------------------|--------------|--------------|--------------|----------------------|
| 1                               | 0.706239000  | -2.239326000 | 3.379909000  |                      |
| 1                               | 1.313897000  | -2.502666000 | 1.956026000  |                      |
| 1                               | -0.850644000 | 2.773822000  | 1.239708000  |                      |
| 1                               | 0.714303000  | 2.996119000  | 0.987594000  |                      |
| E(RmPW+HF-B95) = -1079.30824051 |              |              |              | N <sub>img</sub> = 1 |
| <b>EAW-3</b>                    |              |              |              |                      |
| <b>At. No</b>                   | <b>X</b>     | <b>Y</b>     | <b>Z</b>     |                      |
| 6                               | 1.041666000  | 0.146180000  | -0.141165000 |                      |
| 6                               | 2.466703000  | 0.221350000  | 0.372196000  |                      |
| 8                               | 3.372637000  | 0.357998000  | -0.688086000 |                      |
| 1                               | 0.706227000  | 1.124668000  | -0.473600000 |                      |
| 1                               | 1.023617000  | -0.514721000 | -1.010247000 |                      |
| 1                               | 2.574993000  | 1.041589000  | 1.083571000  |                      |
| 1                               | 2.718255000  | -0.699330000 | 0.894252000  |                      |
| 8                               | 3.168483000  | 3.018763000  | -1.240060000 |                      |
| 1                               | 3.368955000  | 1.278532000  | -0.996634000 |                      |
| 1                               | 2.901254000  | 3.411543000  | -2.065626000 |                      |
| 8                               | 3.081191000  | -2.075964000 | -1.889038000 |                      |
| 1                               | 3.900505000  | -2.495804000 | -2.135527000 |                      |
| 1                               | 3.301489000  | -1.177973000 | -1.588521000 |                      |
| 8                               | 1.670953000  | 4.144116000  | 0.725338000  |                      |
| 1                               | 2.674977000  | 3.473821000  | -0.536507000 |                      |
| 1                               | 1.987096000  | 4.659039000  | 1.461662000  |                      |
| 8                               | 1.409458000  | -3.441926000 | -0.139492000 |                      |
| 1                               | 1.981170000  | -3.015439000 | -0.797460000 |                      |
| 1                               | 0.505635000  | -3.239588000 | -0.371854000 |                      |
| 7                               | -3.887769000 | 0.405133000  | -1.146101000 |                      |
| 6                               | -3.032643000 | 1.443889000  | -1.331616000 |                      |
| 7                               | -1.874979000 | 1.261405000  | -0.775721000 |                      |
| 6                               | -1.969367000 | 0.022205000  | -0.186817000 |                      |
| 6                               | -1.096866000 | -0.737608000 | 0.604920000  |                      |

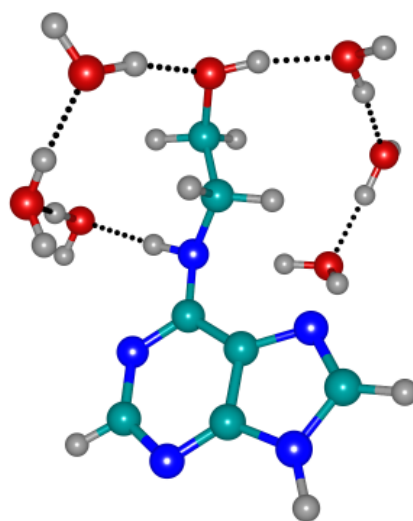

|                                                           |              |              |              |                                                                                      |
|-----------------------------------------------------------|--------------|--------------|--------------|--------------------------------------------------------------------------------------|
| 7                                                         | 0.172231000  | -0.365613000 | 0.910292000  |                                                                                      |
| 7                                                         | -1.553514000 | -1.885220000 | 1.106374000  |                                                                                      |
| 6                                                         | -2.796250000 | -2.270856000 | 0.834562000  |                                                                                      |
| 7                                                         | -3.696104000 | -1.661648000 | 0.084961000  |                                                                                      |
| 6                                                         | -3.230107000 | -0.518885000 | -0.391262000 |                                                                                      |
| 8                                                         | 1.610945000  | -2.456609000 | 2.414702000  |                                                                                      |
| 8                                                         | -0.441476000 | 2.581159000  | 1.423308000  |                                                                                      |
| 1                                                         | -4.833208000 | 0.332256000  | -1.468756000 |                                                                                      |
| 1                                                         | -3.317812000 | 2.320736000  | -1.884379000 |                                                                                      |
| 1                                                         | -0.192029000 | 1.701089000  | 1.718652000  |                                                                                      |
| 1                                                         | 0.623462000  | -1.063256000 | 1.500706000  |                                                                                      |
| 1                                                         | -3.100139000 | -3.208472000 | 1.276499000  |                                                                                      |
| 1                                                         | 1.020070000  | -2.917440000 | 3.004292000  |                                                                                      |
| 1                                                         | 1.631195000  | -2.971489000 | 1.592786000  |                                                                                      |
| 1                                                         | -0.960046000 | 2.420372000  | 0.625970000  |                                                                                      |
| 1                                                         | 0.913058000  | 3.617978000  | 1.037116000  |                                                                                      |
| E(RmPW+HF-B95) = -1079.35776085      N <sub>img</sub> = 0 |              |              |              |                                                                                      |
| <b>EA</b>                                                 |              |              |              |                                                                                      |
| <b>At. No</b>                                             | <b>X</b>     | <b>Y</b>     | <b>Z</b>     | 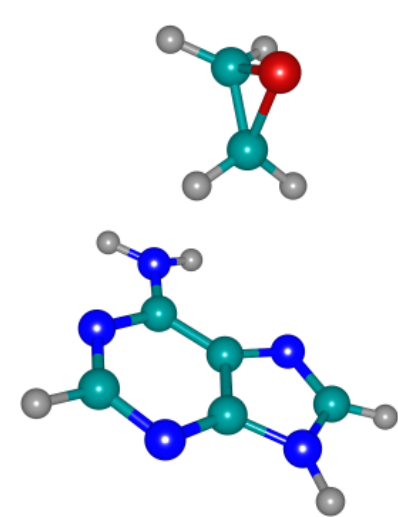 |
| 6                                                         | 1.381117000  | 0.108762000  | -0.677563000 |                                                                                      |
| 6                                                         | 2.723791000  | -0.008517000 | -0.132211000 |                                                                                      |
| 8                                                         | 2.513698000  | 0.159772000  | -1.513393000 |                                                                                      |
| 1                                                         | 0.844316000  | 1.042222000  | -0.573110000 |                                                                                      |
| 1                                                         | 0.769726000  | -0.777534000 | -0.779069000 |                                                                                      |
| 1                                                         | 3.171094000  | 0.837448000  | 0.371841000  |                                                                                      |
| 1                                                         | 3.095738000  | -0.980388000 | 0.162039000  |                                                                                      |
| 7                                                         | -3.453122000 | 1.124509000  | -1.318124000 |                                                                                      |
| 6                                                         | -2.980787000 | 2.136913000  | -0.535959000 |                                                                                      |
| 7                                                         | -2.225075000 | 1.729519000  | 0.435017000  |                                                                                      |
| 6                                                         | -2.199081000 | 0.368597000  | 0.281914000  |                                                                                      |
| 6                                                         | -1.565230000 | -0.652648000 | 0.996553000  |                                                                                      |

|                  |              |              |                |                      |
|------------------|--------------|--------------|----------------|----------------------|
| 7                | -0.782133000 | -0.402256000 | 2.056137000    |                      |
| 7                | -1.723293000 | -1.907326000 | 0.590040000    |                      |
| 6                | -2.482789000 | -2.142692000 | -0.477804000   |                      |
| 7                | -3.133714000 | -1.276833000 | -1.231611000   |                      |
| 6                | -2.954546000 | -0.033753000 | -0.804563000   |                      |
| 1                | -4.045097000 | 1.204411000  | -2.121792000   |                      |
| 1                | -3.230899000 | 3.163524000  | -0.734150000   |                      |
| 1                | -0.741547000 | 0.521394000  | 2.436273000    |                      |
| 1                | -0.432198000 | -1.175270000 | 2.584820000    |                      |
| 1                | -2.574337000 | -3.181465000 | -0.759325000   |                      |
| E(RmPW+HF-B95) = |              |              | -620.860928142 | N <sub>img</sub> = 0 |
| <b>EA-TS1</b>    |              |              |                |                      |
| <b>At. No</b>    | <b>X</b>     | <b>Y</b>     | <b>Z</b>       |                      |
| 6                | -2.376109000 | -0.037771000 | -0.299451000   |                      |
| 6                | -3.779062000 | -0.287020000 | 0.161649000    |                      |
| 8                | -4.281779000 | -0.490036000 | -1.049380000   |                      |
| 1                | -1.929274000 | -0.908734000 | -0.758788000   |                      |
| 1                | -2.285522000 | 0.857768000  | -0.898069000   |                      |
| 1                | -3.810393000 | -1.144895000 | 0.869116000    |                      |
| 1                | -4.163753000 | 0.592187000  | 0.724674000    |                      |
| 7                | 2.911443000  | -1.050387000 | -0.408186000   |                      |
| 6                | 2.145026000  | -2.094540000 | 0.018469000    |                      |
| 7                | 0.969882000  | -1.743401000 | 0.439815000    |                      |
| 6                | 0.960452000  | -0.387333000 | 0.277859000    |                      |
| 6                | 0.024464000  | 0.599846000  | 0.525105000    |                      |
| 7                | -1.274857000 | 0.288523000  | 0.968876000    |                      |
| 7                | 0.292676000  | 1.862257000  | 0.278818000    |                      |
| 6                | 1.491091000  | 2.163121000  | -0.222750000   |                      |
| 7                | 2.472450000  | 1.328975000  | -0.513923000   |                      |
| 6                | 2.164458000  | 0.073744000  | -0.247962000   |                      |
| 1                | 3.842377000  | -1.093949000 | -0.776836000   |                      |

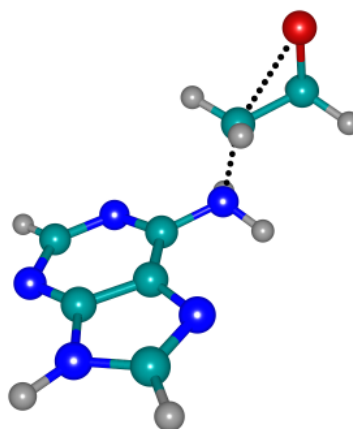

|                                 |              |              |              |                      |
|---------------------------------|--------------|--------------|--------------|----------------------|
| 1                               | 2.510971000  | -3.105238000 | -0.005033000 |                      |
| 1                               | -1.290735000 | -0.542545000 | 1.547152000  |                      |
| 1                               | -1.675952000 | 1.073928000  | 1.466741000  |                      |
| 1                               | 1.673425000  | 3.209708000  | -0.409239000 |                      |
| E(RmPW+HF-B95) = -620.778088454 |              |              |              | N <sub>img</sub> = 1 |
| <b>EA-1</b>                     |              |              |              |                      |
| <b>At. No</b>                   | <b>X</b>     | <b>Y</b>     | <b>Z</b>     |                      |
| 6                               | -2.296539000 | -0.057244000 | -0.378461000 |                      |
| 6                               | -3.711011000 | -0.243150000 | 0.207853000  |                      |
| 8                               | -4.557812000 | -0.522551000 | -0.729717000 |                      |
| 1                               | -1.934807000 | -0.961950000 | -0.853884000 |                      |
| 1                               | -2.248405000 | 0.790222000  | -1.052492000 |                      |
| 1                               | -3.572150000 | -1.022828000 | 1.020470000  |                      |
| 1                               | -3.888174000 | 0.714504000  | 0.791334000  |                      |
| 7                               | 2.941017000  | -1.030857000 | -0.334094000 |                      |
| 6                               | 2.150791000  | -2.091753000 | -0.002869000 |                      |
| 7                               | 0.943504000  | -1.761540000 | 0.337296000  |                      |
| 6                               | 0.936841000  | -0.402122000 | 0.220977000  |                      |
| 6                               | -0.014630000 | 0.575903000  | 0.421566000  |                      |
| 7                               | -1.355792000 | 0.246659000  | 0.784767000  |                      |
| 7                               | 0.257557000  | 1.844954000  | 0.247526000  |                      |
| 6                               | 1.488652000  | 2.170610000  | -0.150140000 |                      |
| 7                               | 2.492539000  | 1.347725000  | -0.393458000 |                      |
| 6                               | 2.176556000  | 0.083590000  | -0.195086000 |                      |
| 1                               | 3.898846000  | -1.058575000 | -0.628562000 |                      |
| 1                               | 2.524543000  | -3.099551000 | -0.030849000 |                      |
| 1                               | -1.389133000 | -0.568518000 | 1.394827000  |                      |
| 1                               | -1.779945000 | 1.030155000  | 1.282972000  |                      |
| 1                               | 1.678416000  | 3.223530000  | -0.284408000 |                      |
| E(RmPW+HF-B95) = -620.780945488 |              |              |              | N <sub>img</sub> = 0 |
| <b>EGw</b>                      |              |              |              |                      |

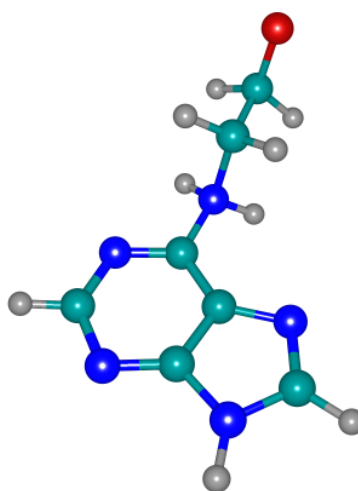

| At. No                          | X            | Y            | Z                    |
|---------------------------------|--------------|--------------|----------------------|
| 6                               | 0.420982000  | 0.012024000  | -1.468626000         |
| 6                               | 1.099406000  | -0.063900000 | -0.187952000         |
| 8                               | 1.840919000  | -0.133032000 | -1.408320000         |
| 1                               | 0.081666000  | 0.969373000  | -1.837782000         |
| 1                               | -0.096132000 | -0.857478000 | -1.848876000         |
| 1                               | 1.260622000  | 0.841280000  | 0.379801000          |
| 1                               | 1.081036000  | -0.983762000 | 0.379288000          |
| 8                               | 2.926154000  | 2.431424000  | -1.334611000         |
| 1                               | 2.683331000  | 1.516236000  | -1.529440000         |
| 1                               | 2.874410000  | 2.923603000  | -2.149322000         |
| 8                               | 1.500989000  | -2.895772000 | -1.645047000         |
| 1                               | 2.135788000  | -3.567524000 | -1.877698000         |
| 1                               | 1.948652000  | -2.044118000 | -1.694799000         |
| 8                               | 2.147292000  | 3.302505000  | 1.151791000          |
| 1                               | 2.415385000  | 3.087529000  | 0.244687000          |
| 1                               | 2.938962000  | 3.290429000  | 1.682209000          |
| 8                               | -0.337294000 | -3.372786000 | 0.515931000          |
| 1                               | 0.246379000  | -3.257516000 | -0.241745000         |
| 1                               | -0.992801000 | -2.656857000 | 0.494029000          |
| 8                               | 0.501522000  | -2.378214000 | 2.883785000          |
| 8                               | -0.326714000 | 2.858254000  | 2.241894000          |
| 1                               | 0.478052000  | -2.967113000 | 3.632265000          |
| 1                               | 0.311314000  | -2.912934000 | 2.092696000          |
| 1                               | -0.636047000 | 3.659323000  | 2.656789000          |
| 1                               | 0.539752000  | 3.063233000  | 1.852124000          |
| 7                               | -3.286795000 | -1.952143000 | -1.393566000         |
| 6                               | -3.883690000 | -1.339322000 | -2.464051000         |
| 7                               | -3.808865000 | -0.051083000 | -2.409360000         |
| 6                               | -3.136070000 | 0.206025000  | -1.245783000         |
| 6                               | -2.725442000 | 1.441701000  | -0.654428000         |
| 8                               | -2.852974000 | 2.577341000  | -1.051612000         |
| 7                               | -2.063162000 | 1.201427000  | 0.561856000          |
| 6                               | -1.763715000 | -0.007757000 | 1.104367000          |
| 7                               | -1.068220000 | 0.000752000  | 2.243841000          |
| 7                               | -2.119892000 | -1.143096000 | 0.545895000          |
| 6                               | -2.802897000 | -0.965772000 | -0.600147000         |
| 1                               | -4.354847000 | -1.905966000 | -3.246193000         |
| 1                               | -1.674575000 | 2.021660000  | 1.012132000          |
| 1                               | -0.705723000 | 0.875258000  | 2.583163000          |
| 1                               | -0.670773000 | -0.864264000 | 2.586711000          |
| 1                               | -3.223882000 | -2.935288000 | -1.210961000         |
| E(RmPW+HF-B95) = -1154.54237064 |              |              | N <sub>img</sub> = 0 |
| <b>EGw-TS1</b>                  |              |              |                      |

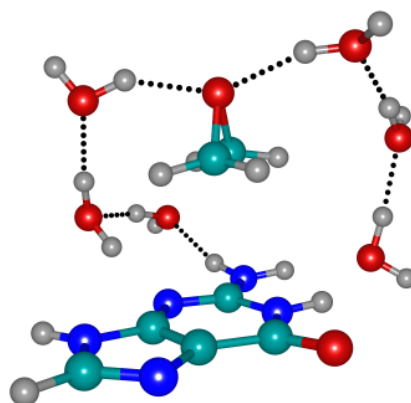

| At. No                          | X            | Y            | Z                    |
|---------------------------------|--------------|--------------|----------------------|
| 6                               | -1.442432000 | 0.230710000  | -1.169340000         |
| 6                               | -1.816860000 | 0.646197000  | 0.178594000          |
| 8                               | -2.546942000 | 0.969681000  | -1.558018000         |
| 1                               | -1.516958000 | -0.840471000 | -1.366512000         |
| 1                               | -0.487761000 | 0.616086000  | -1.532481000         |
| 1                               | -2.668194000 | 0.154134000  | 0.619005000          |
| 1                               | -1.653359000 | 1.678658000  | 0.435651000          |
| 8                               | -4.465237000 | -0.754820000 | -1.769708000         |
| 1                               | -3.791898000 | -0.023571000 | -1.770245000         |
| 1                               | -4.552153000 | -1.071450000 | -2.663768000         |
| 8                               | -1.310162000 | 3.289491000  | -1.658716000         |
| 1                               | -1.727690000 | 4.018935000  | -2.105899000         |
| 1                               | -1.903341000 | 2.506610000  | -1.737170000         |
| 8                               | -4.032867000 | -2.217639000 | 0.390604000          |
| 1                               | -4.213571000 | -1.754786000 | -0.456945000         |
| 1                               | -4.841647000 | -2.195015000 | 0.893782000          |
| 8                               | 0.335100000  | 3.359544000  | 0.560330000          |
| 1                               | -0.205913000 | 3.445705000  | -0.241272000         |
| 1                               | 0.835763000  | 2.540808000  | 0.474770000          |
| 8                               | -0.813854000 | 2.477245000  | 2.802907000          |
| 8                               | -1.644559000 | -2.630738000 | 1.526913000          |
| 1                               | -0.598778000 | 2.917929000  | 3.619515000          |
| 1                               | -0.442104000 | 3.007380000  | 2.070886000          |
| 1                               | -1.637435000 | -3.495880000 | 1.928999000          |
| 1                               | -2.513637000 | -2.532015000 | 1.086600000          |
| 7                               | 3.677990000  | 0.998533000  | -0.332293000         |
| 6                               | 4.544657000  | 0.169303000  | -0.986514000         |
| 7                               | 4.114103000  | -1.048379000 | -1.064133000         |
| 6                               | 2.904749000  | -1.025494000 | -0.433606000         |
| 6                               | 1.953149000  | -2.073026000 | -0.205980000         |
| 8                               | 1.981390000  | -3.237885000 | -0.512940000         |
| 7                               | 0.839568000  | -1.561005000 | 0.496460000          |
| 6                               | 0.675624000  | -0.290106000 | 0.910614000          |
| 7                               | -0.531139000 | -0.004855000 | 1.530218000          |
| 7                               | 1.524476000  | 0.666108000  | 0.699630000          |
| 6                               | 2.617380000  | 0.239722000  | 0.028423000          |
| 1                               | 5.477365000  | 0.527508000  | -1.381976000         |
| 1                               | 0.089980000  | -2.220305000 | 0.683908000          |
| 1                               | -0.970919000 | -0.826683000 | 1.932199000          |
| 1                               | -0.484180000 | 0.792822000  | 2.171004000          |
| 1                               | 3.790879000  | 1.977907000  | -0.153341000         |
| E(RmPW+HF-B95) = -1154.49858336 |              |              | N <sub>img</sub> = 1 |
| <b>EGw-1</b>                    |              |              |                      |
| At. No                          | X            | Y            | Z                    |

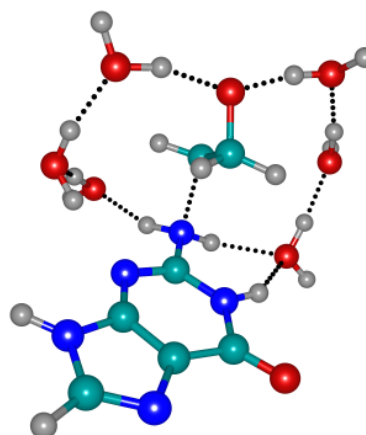

|   |              |              |              |
|---|--------------|--------------|--------------|
| 6 | -1.543301000 | 0.156193000  | -1.048318000 |
| 6 | -1.669870000 | 0.627301000  | 0.391912000  |
| 8 | -2.470225000 | 0.836314000  | -1.772812000 |
| 1 | -1.681316000 | -0.937409000 | -1.089885000 |
| 1 | -0.515433000 | 0.348308000  | -1.396170000 |
| 1 | -2.638931000 | 0.354905000  | 0.796284000  |
| 1 | -1.558949000 | 1.702589000  | 0.434541000  |
| 8 | -4.412481000 | -0.701982000 | -1.748517000 |
| 1 | -3.659091000 | 0.002368000  | -1.820795000 |
| 1 | -4.539777000 | -1.078359000 | -2.614138000 |
| 8 | -1.587718000 | 3.208262000  | -1.475079000 |
| 1 | -1.762657000 | 3.791286000  | -2.206752000 |
| 1 | -2.015863000 | 2.313597000  | -1.679185000 |
| 8 | -4.007194000 | -2.180065000 | 0.315951000  |
| 1 | -4.161814000 | -1.656840000 | -0.522401000 |
| 1 | -4.813820000 | -2.127101000 | 0.820271000  |
| 8 | 0.184929000  | 3.454576000  | 0.550197000  |
| 1 | -0.453135000 | 3.515873000  | -0.189097000 |
| 1 | 0.757433000  | 2.717463000  | 0.329802000  |
| 8 | -0.574265000 | 2.290083000  | 2.813011000  |
| 8 | -1.699918000 | -2.467689000 | 1.475276000  |
| 1 | -0.172734000 | 2.622060000  | 3.610664000  |
| 1 | -0.343197000 | 2.899098000  | 2.077178000  |
| 1 | -1.715894000 | -3.265800000 | 1.997809000  |
| 1 | -2.581035000 | -2.398597000 | 1.020377000  |
| 7 | 3.694778000  | 1.024588000  | -0.292620000 |
| 6 | 4.600397000  | 0.182907000  | -0.868795000 |
| 7 | 4.174979000  | -1.037973000 | -0.949022000 |
| 6 | 2.928275000  | -1.002598000 | -0.404149000 |
| 6 | 1.969103000  | -2.054829000 | -0.217550000 |
| 8 | 2.026963000  | -3.224707000 | -0.485621000 |

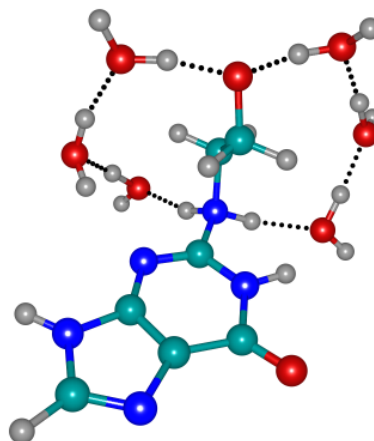



|                                                           |              |              |              |  |
|-----------------------------------------------------------|--------------|--------------|--------------|--|
| 7                                                         | 0.803766000  | -1.528226000 | 0.394391000  |  |
| 6                                                         | 0.627205000  | -0.249236000 | 0.749801000  |  |
| 7                                                         | -0.643238000 | 0.047311000  | 1.349181000  |  |
| 7                                                         | 1.473087000  | 0.704540000  | 0.601188000  |  |
| 6                                                         | 2.612302000  | 0.272107000  | 0.009983000  |  |
| 1                                                         | 5.557817000  | 0.532274000  | -1.209273000 |  |
| 1                                                         | 0.038802000  | -2.181936000 | 0.542945000  |  |
| 1                                                         | -1.036912000 | -0.822228000 | 1.735599000  |  |
| 1                                                         | -0.507441000 | 0.765457000  | 2.097173000  |  |
| 1                                                         | 3.797265000  | 2.008464000  | -0.131628000 |  |
| E(RmPW+HF-B95) = -1154.52174655      N <sub>img</sub> = 0 |              |              |              |  |
| <b>EGw-TS2</b>                                            |              |              |              |  |
| <b>At. No</b>                                             | <b>X</b>     | <b>Y</b>     | <b>Z</b>     |  |
| 6                                                         | -1.442587000 | -0.048474000 | -1.020557000 |  |
| 6                                                         | -1.606654000 | 0.506902000  | 0.380309000  |  |
| 8                                                         | -2.462018000 | 0.469431000  | -1.801383000 |  |
| 1                                                         | -1.507444000 | -1.138766000 | -1.026385000 |  |
| 1                                                         | -0.462601000 | 0.228731000  | -1.419268000 |  |
| 1                                                         | -2.528741000 | 0.151508000  | 0.827889000  |  |
| 1                                                         | -1.636255000 | 1.586289000  | 0.323217000  |  |
| 8                                                         | -4.385437000 | -1.302508000 | -1.658123000 |  |
| 1                                                         | -3.761958000 | -0.553335000 | -1.797232000 |  |
| 1                                                         | -4.497758000 | -1.737688000 | -2.498228000 |  |
| 8                                                         | -2.151304000 | 2.894845000  | -1.462961000 |  |
| 1                                                         | -2.764612000 | 3.508327000  | -1.855935000 |  |
| 1                                                         | -2.402109000 | 1.511002000  | -1.747634000 |  |
| 8                                                         | -3.782533000 | -2.518243000 | 0.615141000  |  |
| 1                                                         | -4.000658000 | -2.134074000 | -0.262518000 |  |
| 1                                                         | -4.569097000 | -2.438646000 | 1.147539000  |  |
| 8                                                         | -0.912577000 | 3.789735000  | 0.391470000  |  |
| 1                                                         | -1.516385000 | 3.419836000  | -0.489098000 |  |

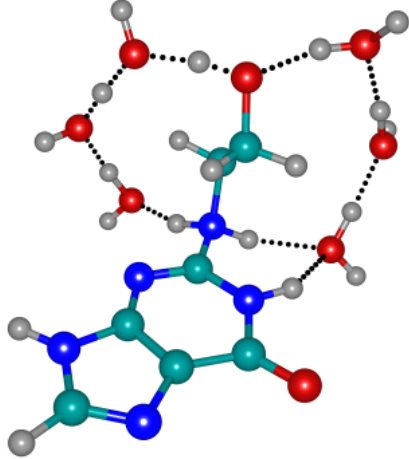

|                                                          |              |              |              |
|----------------------------------------------------------|--------------|--------------|--------------|
| 1                                                        | -0.099042000 | 4.139438000  | 0.039715000  |
| 8                                                        | -0.664951000 | 2.438004000  | 2.492139000  |
| 8                                                        | -1.374008000 | -2.462774000 | 1.704993000  |
| 1                                                        | -0.122789000 | 2.872751000  | 3.143339000  |
| 1                                                        | -0.751063000 | 3.052483000  | 1.673815000  |
| 1                                                        | -1.269750000 | -3.241694000 | 2.246470000  |
| 1                                                        | -2.266613000 | -2.519810000 | 1.293962000  |
| 7                                                        | 3.761786000  | 1.221952000  | -0.404931000 |
| 6                                                        | 4.692059000  | 0.393121000  | -0.958403000 |
| 7                                                        | 4.318482000  | -0.847702000 | -0.972318000 |
| 6                                                        | 3.081006000  | -0.838065000 | -0.405480000 |
| 6                                                        | 2.171102000  | -1.918311000 | -0.146613000 |
| 8                                                        | 2.276548000  | -3.098965000 | -0.353834000 |
| 7                                                        | 0.994387000  | -1.409367000 | 0.450524000  |
| 6                                                        | 0.771568000  | -0.117932000 | 0.750891000  |
| 7                                                        | -0.504020000 | 0.155740000  | 1.346888000  |
| 7                                                        | 1.574392000  | 0.857567000  | 0.546296000  |
| 6                                                        | 2.717134000  | 0.441265000  | -0.045395000 |
| 1                                                        | 5.627383000  | 0.765081000  | -1.334641000 |
| 1                                                        | 0.271296000  | -2.089150000 | 0.668291000  |
| 1                                                        | -0.802074000 | -0.667399000 | 1.877274000  |
| 1                                                        | -0.424057000 | 1.034157000  | 1.973295000  |
| 1                                                        | 3.817595000  | 2.216390000  | -0.297121000 |
| E(RmPW+HF-B95) = -1154.51529192      N <sub>img</sub> =1 |              |              |              |
| <b>EGw-2</b>                                             |              |              |              |
| <b>At. No</b>                                            | <b>X</b>     | <b>Y</b>     | <b>Z</b>     |
| 6                                                        | -1.470900000 | 0.147263000  | -1.714498000 |
| 6                                                        | -1.244088000 | 0.694294000  | -0.315635000 |
| 8                                                        | -2.582986000 | 0.756933000  | -2.324305000 |
| 1                                                        | -1.694795000 | -0.917011000 | -1.650553000 |
| 1                                                        | -0.576496000 | 0.267786000  | -2.323999000 |

|   |              |              |              |
|---|--------------|--------------|--------------|
| 1 | -2.213058000 | 0.869814000  | 0.147850000  |
| 1 | -0.712740000 | 1.640246000  | -0.355284000 |
| 8 | -4.485898000 | -0.753320000 | -1.169474000 |
| 1 | -3.933209000 | -0.132535000 | -1.680785000 |
| 1 | -5.006102000 | -1.254017000 | -1.791158000 |
| 8 | -2.477734000 | 3.402664000  | -1.559985000 |
| 1 | -3.156600000 | 4.016366000  | -1.826099000 |
| 1 | -2.552508000 | 1.715701000  | -2.171799000 |
| 8 | -3.160027000 | -1.657759000 | 1.010671000  |
| 1 | -3.661620000 | -1.436841000 | 0.204070000  |
| 1 | -3.626220000 | -1.239901000 | 1.730952000  |
| 8 | -1.907221000 | 3.874672000  | 1.095490000  |
| 1 | -2.304213000 | 3.569412000  | -0.618401000 |
| 1 | -1.226575000 | 4.522353000  | 1.256802000  |
| 8 | -1.265193000 | 1.651103000  | 2.643507000  |
| 8 | -0.976658000 | -3.083123000 | 1.837893000  |
| 1 | -0.884837000 | 1.619818000  | 3.517208000  |
| 1 | -1.720869000 | 3.130863000  | 1.687987000  |
| 1 | -0.879356000 | -4.030204000 | 1.888385000  |
| 1 | -1.875467000 | -2.887363000 | 1.545658000  |
| 7 | 3.786640000  | 0.768194000  | -1.070184000 |
| 6 | 4.950318000  | 0.073704000  | -0.882190000 |
| 7 | 4.788734000  | -0.990880000 | -0.166567000 |
| 6 | 3.456052000  | -1.003007000 | 0.135454000  |
| 6 | 2.675844000  | -1.945415000 | 0.880350000  |
| 8 | 3.003246000  | -2.971695000 | 1.428450000  |
| 7 | 1.332844000  | -1.530232000 | 0.920773000  |
| 6 | 0.817448000  | -0.425188000 | 0.332430000  |
| 7 | -0.516032000 | -0.206397000 | 0.551556000  |
| 7 | 1.513076000  | 0.425283000  | -0.360815000 |
| 6 | 2.815172000  | 0.083977000  | -0.419482000 |

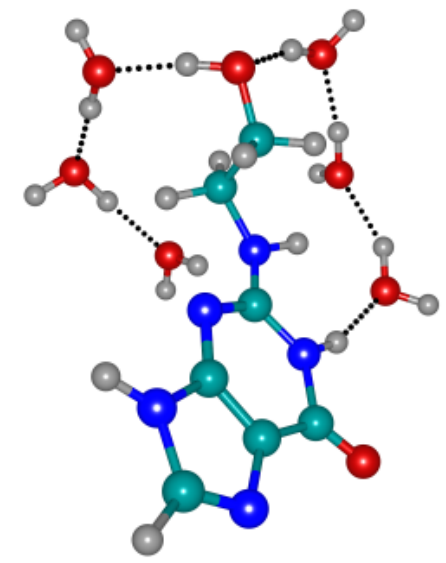

The image shows a 3D ball-and-stick model of a complex organic molecule. The structure features a central core with several nitrogen (blue) and oxygen (red) atoms. The molecule is surrounded by several water molecules (grey and red spheres) which are connected to the main structure via hydrogen bonds, represented by dashed lines. The overall structure is highly branched and appears to be a part of a larger assembly or a specific conformation of a molecule.

|                                                           |              |              |              |  |
|-----------------------------------------------------------|--------------|--------------|--------------|--|
| 1                                                         | 5.881380000  | 0.409369000  | -1.300965000 |  |
| 1                                                         | 0.692669000  | -2.162038000 | 1.390064000  |  |
| 1                                                         | -1.049135000 | -1.021603000 | 0.817071000  |  |
| 1                                                         | -0.850944000 | 0.947953000  | 2.124186000  |  |
| 1                                                         | 3.657766000  | 1.614438000  | -1.589115000 |  |
| E(RmPW+HF-B95) = -1154.57702323      N <sub>img</sub> = 0 |              |              |              |  |
| <b>EG</b>                                                 |              |              |              |  |
| <b>At. No</b>                                             | <b>X</b>     | <b>Y</b>     | <b>Z</b>     |  |
| 6                                                         | -2.149279000 | -1.047496000 | 1.099677000  |  |
| 6                                                         | -3.008456000 | -0.850981000 | -0.058401000 |  |
| 8                                                         | -3.076959000 | -2.030495000 | 0.705423000  |  |
| 1                                                         | -2.378490000 | -0.545673000 | 2.029833000  |  |
| 1                                                         | -1.109764000 | -1.310073000 | 0.954562000  |  |
| 1                                                         | -3.869234000 | -0.201003000 | 0.020026000  |  |
| 1                                                         | -2.592787000 | -0.966298000 | -1.050194000 |  |
| 7                                                         | 1.805373000  | -1.322341000 | -1.308613000 |  |
| 6                                                         | 2.695778000  | -1.614828000 | -0.311589000 |  |
| 7                                                         | 2.576447000  | -0.834053000 | 0.711993000  |  |
| 6                                                         | 1.560347000  | 0.015819000  | 0.377908000  |  |
| 6                                                         | 0.956477000  | 1.080829000  | 1.115213000  |  |
| 8                                                         | 1.182256000  | 1.510717000  | 2.219800000  |  |
| 7                                                         | -0.078091000 | 1.664692000  | 0.348198000  |  |
| 6                                                         | -0.468261000 | 1.298876000  | -0.898101000 |  |
| 7                                                         | -1.522369000 | 1.970932000  | -1.433844000 |  |
| 7                                                         | 0.074694000  | 0.326659000  | -1.562865000 |  |
| 6                                                         | 1.066584000  | -0.274598000 | -0.877094000 |  |
| 1                                                         | 3.404763000  | -2.416804000 | -0.405531000 |  |
| 1                                                         | -0.575490000 | 2.388681000  | 0.836849000  |  |
| 1                                                         | -1.671934000 | 2.921997000  | -1.158349000 |  |
| 1                                                         | -1.662979000 | 1.787583000  | -2.409197000 |  |
| 1                                                         | 1.702023000  | -1.787142000 | -2.189537000 |  |

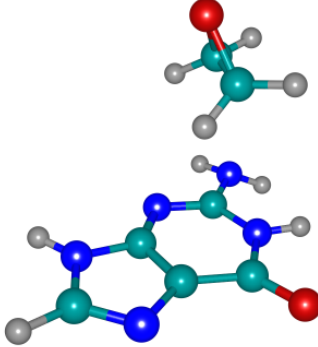

|                                 |              |              |              |                      |  |  |  |
|---------------------------------|--------------|--------------|--------------|----------------------|--|--|--|
| E(RmPW+HF-B95) = -1154.57702323 |              |              |              | N <sub>img</sub> = 0 |  |  |  |
| <b>EG-TS1</b>                   |              |              |              |                      |  |  |  |
| <b>At. No</b>                   | <b>X</b>     | <b>Y</b>     | <b>Z</b>     |                      |  |  |  |
| 6                               | -3.766106000 | 0.365862000  | -0.106540000 |                      |  |  |  |
| 6                               | -2.911165000 | -0.737051000 | 0.428473000  |                      |  |  |  |
| 8                               | -4.568334000 | 0.436394000  | 0.938030000  |                      |  |  |  |
| 1                               | -4.216258000 | 0.063548000  | -1.082060000 |                      |  |  |  |
| 1                               | -3.161172000 | 1.279972000  | -0.337612000 |                      |  |  |  |
| 1                               | -3.475598000 | -1.648941000 | 0.561099000  |                      |  |  |  |
| 1                               | -2.343400000 | -0.456524000 | 1.305241000  |                      |  |  |  |
| 7                               | 2.941980000  | -1.348920000 | 0.277855000  |                      |  |  |  |
| 6                               | 3.806950000  | -0.306525000 | 0.440388000  |                      |  |  |  |
| 7                               | 3.237084000  | 0.848246000  | 0.297335000  |                      |  |  |  |
| 6                               | 1.935721000  | 0.556993000  | 0.029329000  |                      |  |  |  |
| 6                               | 0.824074000  | 1.435468000  | -0.208246000 |                      |  |  |  |
| 8                               | 0.762418000  | 2.632789000  | -0.237128000 |                      |  |  |  |
| 7                               | -0.349674000 | 0.662682000  | -0.429067000 |                      |  |  |  |
| 6                               | -0.398846000 | -0.679050000 | -0.438835000 |                      |  |  |  |
| 7                               | -1.678095000 | -1.248760000 | -0.669214000 |                      |  |  |  |
| 7                               | 0.582608000  | -1.477815000 | -0.228654000 |                      |  |  |  |
| 6                               | 1.732539000  | -0.804852000 | 0.013586000  |                      |  |  |  |
| 1                               | 4.846111000  | -0.464544000 | 0.663454000  |                      |  |  |  |
| 1                               | -1.204426000 | 1.197514000  | -0.519393000 |                      |  |  |  |
| 1                               | -2.060673000 | -0.975250000 | -1.569320000 |                      |  |  |  |
| 1                               | -1.562361000 | -2.255253000 | -0.658576000 |                      |  |  |  |
| 1                               | 3.148773000  | -2.327094000 | 0.343228000  |                      |  |  |  |
| E(RmPW+HF-B95) = -695.984090531 |              |              |              | N <sub>img</sub> = 1 |  |  |  |
| <b>EG-1</b>                     |              |              |              |                      |  |  |  |
| <b>At. No</b>                   | <b>X</b>     | <b>Y</b>     | <b>Z</b>     |                      |  |  |  |
| 6                               | -3.730525000 | 0.198791000  | -0.187989000 |                      |  |  |  |
| 6                               | -2.790647000 | -0.769341000 | 0.574131000  |                      |  |  |  |

|                                                           |              |              |              |                                                                                    |
|-----------------------------------------------------------|--------------|--------------|--------------|------------------------------------------------------------------------------------|
| 8                                                         | -4.752488000 | 0.551967000  | 0.486189000  | 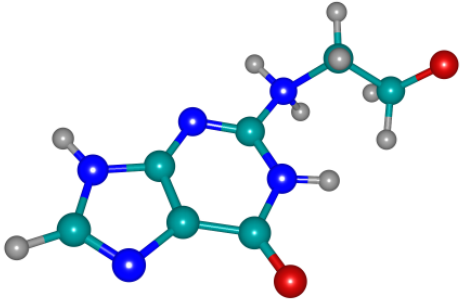 |
| 1                                                         | -3.911731000 | -0.385422000 | -1.165144000 |                                                                                    |
| 1                                                         | -3.039650000 | 1.036673000  | -0.558495000 |                                                                                    |
| 1                                                         | -3.336302000 | -1.650639000 | 0.890538000  |                                                                                    |
| 1                                                         | -2.290409000 | -0.309168000 | 1.419061000  |                                                                                    |
| 7                                                         | 2.950010000  | -1.369404000 | 0.130432000  |                                                                                    |
| 6                                                         | 3.838304000  | -0.341334000 | 0.246515000  |                                                                                    |
| 7                                                         | 3.272559000  | 0.823365000  | 0.186742000  |                                                                                    |
| 6                                                         | 1.950190000  | 0.554164000  | 0.024943000  |                                                                                    |
| 6                                                         | 0.836273000  | 1.455367000  | -0.102612000 |                                                                                    |
| 8                                                         | 0.794749000  | 2.652394000  | -0.101988000 |                                                                                    |
| 7                                                         | -0.363896000 | 0.703211000  | -0.251208000 |                                                                                    |
| 6                                                         | -0.424208000 | -0.632127000 | -0.271332000 |                                                                                    |
| 7                                                         | -1.734893000 | -1.204928000 | -0.429741000 |                                                                                    |
| 7                                                         | 0.550274000  | -1.454330000 | -0.164408000 |                                                                                    |
| 6                                                         | 1.730190000  | -0.804294000 | -0.012876000 |                                                                                    |
| 1                                                         | 4.890899000  | -0.516076000 | 0.373379000  |                                                                                    |
| 1                                                         | -1.221891000 | 1.241944000  | -0.335863000 |                                                                                    |
| 1                                                         | -2.164947000 | -0.944194000 | -1.334994000 |                                                                                    |
| 1                                                         | -1.589983000 | -2.209630000 | -0.439217000 |                                                                                    |
| 1                                                         | 3.150095000  | -2.351117000 | 0.149723000  |                                                                                    |
| E(RmPW+HF-B95) = -695.989319193      N <sub>img</sub> = 0 |              |              |              |                                                                                    |
| <b>ECw</b>                                                |              |              |              |                                                                                    |
| <b>At. No</b>                                             | <b>X</b>     | <b>Y</b>     | <b>Z</b>     |                                                                                    |
| 6                                                         | 1.648286000  | -0.380831000 | -1.313624000 |                                                                                    |
| 6                                                         | 2.409733000  | -0.387897000 | -0.082027000 |                                                                                    |
| 8                                                         | 3.075433000  | -0.302367000 | -1.349368000 |                                                                                    |
| 1                                                         | 1.144683000  | 0.527860000  | -1.613458000 |                                                                                    |
| 1                                                         | 1.241120000  | -1.305175000 | -1.695138000 |                                                                                    |
| 1                                                         | 2.460986000  | 0.515586000  | 0.508684000  |                                                                                    |
| 1                                                         | 2.567269000  | -1.315938000 | 0.444905000  |                                                                                    |
| 8                                                         | 3.531520000  | 2.405210000  | -1.311229000 |                                                                                    |
| 1                                                         | 3.526164000  | 1.448340000  | -1.465595000 |                                                                                    |
| 1                                                         | 3.744575000  | 2.832642000  | -2.135324000 |                                                                                    |

|                                                           |              |              |              |
|-----------------------------------------------------------|--------------|--------------|--------------|
| 8                                                         | 3.106546000  | -3.143004000 | -1.404384000 |
| 1                                                         | 3.337667000  | -3.705100000 | -2.138325000 |
| 1                                                         | 3.422190000  | -2.257801000 | -1.608387000 |
| 8                                                         | 2.340978000  | 3.500401000  | 0.934528000  |
| 1                                                         | 2.704241000  | 3.163438000  | 0.102493000  |
| 1                                                         | 3.079150000  | 3.579634000  | 1.531997000  |
| 8                                                         | 0.777378000  | -3.364765000 | 0.328190000  |
| 1                                                         | 1.467383000  | -3.425296000 | -0.337889000 |
| 1                                                         | 0.072105000  | -2.804317000 | -0.027764000 |
| 8                                                         | 1.210937000  | -1.978128000 | 2.555538000  |
| 8                                                         | -0.210818000 | 3.006806000  | 1.931729000  |
| 1                                                         | 1.031194000  | -2.468715000 | 3.352012000  |
| 1                                                         | 1.116179000  | -2.604698000 | 1.809333000  |
| 1                                                         | -0.427067000 | 3.713707000  | 2.532513000  |
| 1                                                         | 0.667032000  | 3.205343000  | 1.571785000  |
| 7                                                         | -1.105369000 | -1.180443000 | -0.277535000 |
| 6                                                         | -1.727981000 | -1.352909000 | -1.465795000 |
| 7                                                         | -2.532775000 | -0.308879000 | -1.921766000 |
| 6                                                         | -2.609927000 | 0.881199000  | -1.290093000 |
| 6                                                         | -1.939541000 | 1.083988000  | -0.144655000 |
| 6                                                         | -1.181474000 | -0.025869000 | 0.361968000  |
| 7                                                         | -0.530569000 | 0.129286000  | 1.506491000  |
| 8                                                         | -1.613492000 | -2.347014000 | -2.158018000 |
| 1                                                         | -3.224665000 | 1.635490000  | -1.754140000 |
| 1                                                         | -1.953775000 | 2.023477000  | 0.378616000  |
| 1                                                         | 0.031701000  | -0.618475000 | 1.897254000  |
| 1                                                         | -0.489710000 | 1.047598000  | 1.918704000  |
| 1                                                         | -2.994717000 | -0.473710000 | -2.795776000 |
| E(RmPW+HF-B95) = -1006.96288138      N <sub>img</sub> = 0 |              |              |              |
| <b>ECw-TS1</b>                                            |              |              |              |
| <b>At. No</b>                                             | <b>X</b>     | <b>Y</b>     | <b>Z</b>     |
| 6                                                         | -0.831814000 | 0.670633000  | -1.211682000 |
| 6                                                         | -1.153618000 | 0.620975000  | 0.210798000  |
| 8                                                         | -1.886343000 | 1.563812000  | -1.287254000 |
| 1                                                         | -0.981330000 | -0.263368000 | -1.756575000 |
| 1                                                         | 0.140299000  | 1.101910000  | -1.453149000 |
| 1                                                         | -2.042026000 | 0.078111000  | 0.487751000  |
| 1                                                         | -0.893914000 | 1.483575000  | 0.800403000  |
| 8                                                         | -4.049962000 | 0.178043000  | -1.554768000 |
| 1                                                         | -3.264520000 | 0.788530000  | -1.511640000 |
| 1                                                         | -4.323367000 | 0.110401000  | -2.463985000 |
| 8                                                         | -0.474316000 | 3.742372000  | -0.783909000 |
| 1                                                         | -0.438281000 | 4.400953000  | -1.470179000 |
| 1                                                         | -1.127554000 | 3.058855000  | -1.051273000 |
| 8                                                         | -4.167359000 | -1.632568000 | 0.390778000  |

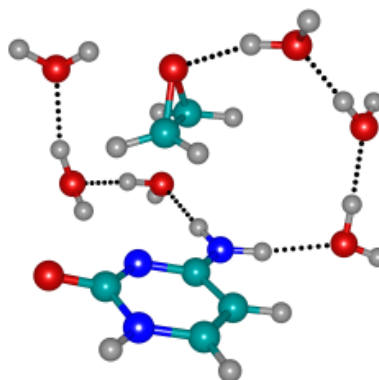

|                                                           |              |              |              |
|-----------------------------------------------------------|--------------|--------------|--------------|
| 1                                                         | -4.153913000 | -1.031208000 | -0.382656000 |
| 1                                                         | -4.851166000 | -1.304833000 | 0.968158000  |
| 8                                                         | 1.480095000  | 2.759517000  | 0.911616000  |
| 1                                                         | 0.895939000  | 3.179040000  | 0.261657000  |
| 1                                                         | 1.910627000  | 2.008384000  | 0.493657000  |
| 8                                                         | 0.471400000  | 1.519646000  | 3.017208000  |
| 8                                                         | -1.875406000 | -2.694829000 | 1.368243000  |
| 1                                                         | 0.947425000  | 1.655420000  | 3.830925000  |
| 1                                                         | 0.857487000  | 2.123489000  | 2.347485000  |
| 1                                                         | -2.087272000 | -3.396035000 | 1.977947000  |
| 1                                                         | -2.724294000 | -2.364307000 | 1.017061000  |
| 7                                                         | 2.068367000  | -0.147781000 | 0.237157000  |
| 6                                                         | 3.107948000  | -0.468271000 | -0.586620000 |
| 7                                                         | 3.059551000  | -1.733971000 | -1.175761000 |
| 6                                                         | 2.047636000  | -2.598864000 | -0.998048000 |
| 6                                                         | 1.013965000  | -2.272216000 | -0.194406000 |
| 6                                                         | 1.096566000  | -0.993786000 | 0.422390000  |
| 7                                                         | 0.053173000  | -0.584135000 | 1.228142000  |
| 8                                                         | 4.038433000  | 0.262020000  | -0.832419000 |
| 1                                                         | 2.115435000  | -3.539386000 | -1.520357000 |
| 1                                                         | 0.175663000  | -2.923502000 | -0.020153000 |
| 1                                                         | 0.327360000  | 0.053863000  | 1.984414000  |
| 1                                                         | -0.560951000 | -1.341516000 | 1.518741000  |
| 1                                                         | 3.834276000  | -1.952090000 | -1.775548000 |
| E(RmPW+HF-B95) = -1006.91817984      N <sub>img</sub> = 1 |              |              |              |
| <b>ECw-1</b>                                              |              |              |              |
| <b>At. No</b>                                             | <b>X</b>     | <b>Y</b>     | <b>Z</b>     |
| 6                                                         | -1.123585000 | 0.250225000  | -1.112556000 |
| 6                                                         | -0.927028000 | 0.497910000  | 0.373111000  |
| 8                                                         | -1.873299000 | 1.274879000  | -1.599865000 |
| 1                                                         | -1.596452000 | -0.736794000 | -1.256137000 |
| 1                                                         | -0.136525000 | 0.189658000  | -1.597560000 |
| 1                                                         | -1.883634000 | 0.501738000  | 0.884726000  |
| 1                                                         | -0.436646000 | 1.449739000  | 0.525874000  |
| 8                                                         | -4.192574000 | 0.468827000  | -1.334521000 |
| 1                                                         | -3.249934000 | 0.883744000  | -1.483151000 |
| 1                                                         | -4.590612000 | 0.341640000  | -2.190156000 |
| 8                                                         | -0.410628000 | 3.298156000  | -0.998553000 |
| 1                                                         | -0.513315000 | 4.040093000  | -1.585768000 |

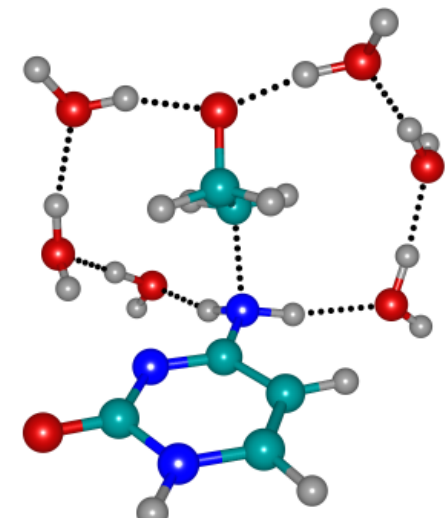




|                                                           |              |              |              |
|-----------------------------------------------------------|--------------|--------------|--------------|
| 1                                                         | -1.047990000 | 2.576832000  | -1.298504000 |
| 8                                                         | -4.137326000 | -1.414894000 | 0.422865000  |
| 1                                                         | -4.174745000 | -0.727121000 | -0.300423000 |
| 1                                                         | -4.754135000 | -1.127849000 | 1.090142000  |
| 8                                                         | 1.369490000  | 2.979849000  | 1.050668000  |
| 1                                                         | 0.754504000  | 3.222370000  | 0.332949000  |
| 1                                                         | 2.052234000  | 2.450262000  | 0.638977000  |
| 8                                                         | 0.531684000  | 1.304393000  | 2.976446000  |
| 8                                                         | -1.886123000 | -2.575517000 | 1.117232000  |
| 1                                                         | 1.098340000  | 1.361294000  | 3.740324000  |
| 1                                                         | 0.816542000  | 2.009506000  | 2.354230000  |
| 1                                                         | -2.099778000 | -3.303125000 | 1.694638000  |
| 1                                                         | -2.744171000 | -2.166666000 | 0.841939000  |
| 7                                                         | 2.057730000  | -0.081450000 | 0.367029000  |
| 6                                                         | 3.197316000  | -0.353563000 | -0.346121000 |
| 7                                                         | 3.194104000  | -1.559204000 | -1.051643000 |
| 6                                                         | 2.168207000  | -2.421476000 | -1.064048000 |
| 6                                                         | 1.048309000  | -2.146749000 | -0.354314000 |
| 6                                                         | 1.083598000  | -0.920031000 | 0.338693000  |
| 7                                                         | -0.081706000 | -0.531896000 | 1.086769000  |
| 8                                                         | 4.160658000  | 0.367771000  | -0.392629000 |
| 1                                                         | 2.288230000  | -3.311907000 | -1.659167000 |
| 1                                                         | 0.182164000  | -2.784724000 | -0.338258000 |
| 1                                                         | 0.225663000  | -0.058268000 | 1.961794000  |
| 1                                                         | -0.678629000 | -1.354859000 | 1.281774000  |
| 1                                                         | 4.029913000  | -1.741521000 | -1.578872000 |
| E(RmPW+HF-B95) = -1006.94401735      N <sub>img</sub> = 0 |              |              |              |
| <b>ECw-TS2</b>                                            |              |              |              |
| <b>At. No</b>                                             | <b>X</b>     | <b>Y</b>     | <b>Z</b>     |
| 6                                                         | -1.129995000 | 0.258500000  | -1.111135000 |
| 6                                                         | -0.936703000 | 0.499124000  | 0.376122000  |

|   |              |              |              |
|---|--------------|--------------|--------------|
| 8 | -1.882236000 | 1.284468000  | -1.592264000 |
| 1 | -1.599627000 | -0.728652000 | -1.262644000 |
| 1 | -0.141973000 | 0.204779000  | -1.594797000 |
| 1 | -1.894767000 | 0.501757000  | 0.884763000  |
| 1 | -0.447086000 | 1.450502000  | 0.533722000  |
| 8 | -4.198284000 | 0.470976000  | -1.346883000 |
| 1 | -3.254635000 | 0.888671000  | -1.487690000 |
| 1 | -4.600818000 | 0.371034000  | -2.204052000 |
| 8 | -0.375465000 | 3.282932000  | -1.021311000 |
| 1 | -0.462329000 | 4.021718000  | -1.615005000 |
| 1 | -1.032526000 | 2.575194000  | -1.310136000 |
| 8 | -4.158084000 | -1.439079000 | 0.384388000  |
| 1 | -4.189973000 | -0.751443000 | -0.339122000 |
| 1 | -4.771125000 | -1.142204000 | 1.051012000  |
| 8 | 1.376959000  | 2.980411000  | 1.055678000  |
| 1 | 0.746946000  | 3.221981000  | 0.351176000  |
| 1 | 2.062718000  | 2.471663000  | 0.623553000  |
| 8 | 0.526004000  | 1.305642000  | 2.976571000  |
| 8 | -1.899616000 | -2.577920000 | 1.085218000  |
| 1 | 1.079123000  | 1.342366000  | 3.751556000  |
| 1 | 0.849250000  | 1.997217000  | 2.357638000  |
| 1 | -2.134437000 | -3.314739000 | 1.642317000  |
| 1 | -2.747905000 | -2.148223000 | 0.810322000  |
| 7 | 2.052012000  | -0.091689000 | 0.386908000  |
| 6 | 3.191371000  | -0.359610000 | -0.328041000 |
| 7 | 3.182208000  | -1.554210000 | -1.051739000 |
| 6 | 2.149496000  | -2.408194000 | -1.082543000 |
| 6 | 1.028325000  | -2.136167000 | -0.373780000 |
| 6 | 1.071246000  | -0.921625000 | 0.339605000  |
| 7 | -0.092801000 | -0.532656000 | 1.089183000  |
| 8 | 4.159052000  | 0.356778000  | -0.361813000 |

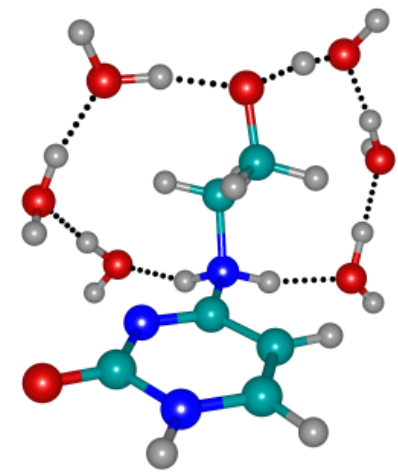

The image shows a 3D ball-and-stick model of a complex organic molecule. The structure features a central core with several nitrogen (blue) and oxygen (red) atoms. The molecule is surrounded by a network of hydrogen bonds, represented by dashed lines connecting hydrogen atoms (grey) to oxygen atoms (red) of neighboring molecules. The overall structure is highly symmetrical and appears to be a dimer or a small cluster of molecules.

|                                 |              |              |              |                      |
|---------------------------------|--------------|--------------|--------------|----------------------|
| 1                               | 2.265476000  | -3.289901000 | -1.691308000 |                      |
| 1                               | 0.156826000  | -2.767022000 | -0.371045000 |                      |
| 1                               | 0.218994000  | -0.058556000 | 1.962440000  |                      |
| 1                               | -0.691301000 | -1.353240000 | 1.286337000  |                      |
| 1                               | 4.018474000  | -1.734407000 | -1.578978000 |                      |
| E(RmPW+HF-B95) = -1006.94388280 |              |              |              | N <sub>img</sub> = 1 |
| <b>ECw-2</b>                    |              |              |              |                      |
| <b>At. No</b>                   | <b>X</b>     | <b>Y</b>     | <b>Z</b>     |                      |
| 6                               | -1.270512000 | 0.179205000  | -1.217797000 |                      |
| 6                               | -1.057437000 | 0.408506000  | 0.264877000  |                      |
| 8                               | -2.143228000 | 1.157694000  | -1.711765000 |                      |
| 1                               | -1.658042000 | -0.821359000 | -1.419272000 |                      |
| 1                               | -0.336620000 | 0.298187000  | -1.761237000 |                      |
| 1                               | -1.967318000 | 0.161074000  | 0.807605000  |                      |
| 1                               | -0.887761000 | 1.474030000  | 0.401959000  |                      |
| 8                               | -4.542968000 | 0.171686000  | -0.831747000 |                      |
| 1                               | -3.047712000 | 0.938869000  | -1.436703000 |                      |
| 1                               | -5.218928000 | -0.121839000 | -1.435608000 |                      |
| 8                               | -0.143064000 | 3.069208000  | -1.484974000 |                      |
| 1                               | -0.143353000 | 3.874728000  | -1.993637000 |                      |
| 1                               | -0.994854000 | 2.634809000  | -1.631266000 |                      |
| 8                               | -4.198534000 | -1.738997000 | 1.097191000  |                      |
| 1                               | -4.463960000 | -0.509180000 | -0.142707000 |                      |
| 1                               | -4.456022000 | -1.520704000 | 1.988754000  |                      |
| 8                               | 1.440912000  | 2.716920000  | 0.881882000  |                      |
| 1                               | 0.977896000  | 2.880479000  | 0.051935000  |                      |
| 1                               | 1.996981000  | 1.941763000  | 0.756490000  |                      |
| 8                               | 0.034278000  | 1.722995000  | 2.979937000  |                      |
| 8                               | -1.579684000 | -2.598513000 | 1.163938000  |                      |
| 1                               | 0.463103000  | 1.853847000  | 3.820520000  |                      |
| 1                               | 0.508807000  | 2.276867000  | 2.336614000  |                      |

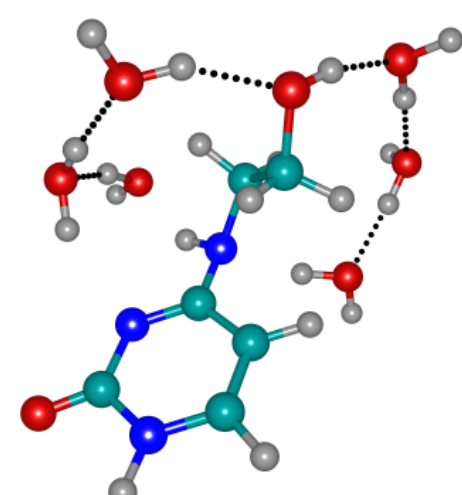

The image shows a 3D ball-and-stick model of a complex organic molecule. The structure features a central ring system with several nitrogen atoms (blue) and oxygen atoms (red). The molecule is surrounded by several water molecules (red and white spheres) which are connected to the main structure via hydrogen bonds, indicated by dashed lines. The overall structure is highly branched and complex.

|                                                           |              |              |              |
|-----------------------------------------------------------|--------------|--------------|--------------|
| 1                                                         | -1.257189000 | -3.357111000 | 1.642668000  |
| 1                                                         | -3.301264000 | -2.104078000 | 1.146074000  |
| 7                                                         | 2.324144000  | -0.169154000 | 0.626379000  |
| 6                                                         | 3.512399000  | -0.565452000 | 0.082891000  |
| 7                                                         | 3.435603000  | -1.507473000 | -0.945642000 |
| 6                                                         | 2.278765000  | -2.030159000 | -1.384538000 |
| 6                                                         | 1.110533000  | -1.645380000 | -0.833545000 |
| 6                                                         | 1.193583000  | -0.675969000 | 0.210719000  |
| 7                                                         | 0.057634000  | -0.311872000 | 0.898329000  |
| 8                                                         | 4.596016000  | -0.147672000 | 0.416479000  |
| 1                                                         | 2.345195000  | -2.765884000 | -2.169584000 |
| 1                                                         | 0.175148000  | -2.087494000 | -1.122761000 |
| 1                                                         | 0.313340000  | 0.200844000  | 1.738820000  |
| 1                                                         | -0.915330000 | -1.892977000 | 1.252124000  |
| 1                                                         | 4.316751000  | -1.776599000 | -1.343163000 |
| E(RmPW+HF-B95) = -1006.98458497      N <sub>img</sub> = 0 |              |              |              |
| <b>EC</b>                                                 |              |              |              |
| <b>At. No</b>                                             | <b>X</b>     | <b>Y</b>     | <b>Z</b>     |
| 6                                                         | -0.357687000 | 0.794323000  | -1.575701000 |
| 6                                                         | -1.259117000 | 0.676312000  | -0.443183000 |
| 8                                                         | -1.718860000 | 1.138524000  | -1.691022000 |
| 1                                                         | -0.060561000 | -0.098994000 | -2.110339000 |
| 1                                                         | 0.340518000  | 1.618708000  | -1.617298000 |
| 1                                                         | -1.621931000 | -0.300632000 | -0.151957000 |
| 1                                                         | -1.221539000 | 1.415601000  | 0.344886000  |
| 7                                                         | 2.052998000  | -0.246019000 | 0.600963000  |
| 6                                                         | 2.713301000  | -0.291371000 | -0.583188000 |
| 7                                                         | 2.486305000  | -1.423001000 | -1.383237000 |
| 6                                                         | 1.631371000  | -2.403046000 | -1.050387000 |
| 6                                                         | 0.946655000  | -2.336561000 | 0.107595000  |
| 6                                                         | 1.211315000  | -1.190564000 | 0.921618000  |

|                                 |              |              |                      |                                                                                     |
|---------------------------------|--------------|--------------|----------------------|-------------------------------------------------------------------------------------|
| 7                               | 0.539734000  | -1.044549000 | 2.079602000          |                                                                                     |
| 8                               | 3.472795000  | 0.556194000  | -0.994205000         |                                                                                     |
| 1                               | 1.527194000  | -3.218178000 | -1.748378000         |                                                                                     |
| 1                               | 0.247120000  | -3.101011000 | 0.395055000          |                                                                                     |
| 1                               | 0.822373000  | -0.293171000 | 2.678467000          |                                                                                     |
| 1                               | 0.019418000  | -1.800703000 | 2.472907000          |                                                                                     |
| 1                               | 3.001415000  | -1.445308000 | -2.243740000         |                                                                                     |
| E(RmPW+HF-B95) = -548.498718124 |              |              | N <sub>img</sub> = 0 |                                                                                     |
| <b>EC-TS1</b>                   |              |              |                      |                                                                                     |
| <b>At. No</b>                   | <b>X</b>     | <b>Y</b>     | <b>Z</b>             |                                                                                     |
| 6                               | 2.424864000  | -0.501289000 | -0.895565000         |                                                                                     |
| 6                               | 2.420695000  | -0.000412000 | 0.513318000          |                                                                                     |
| 8                               | 3.624208000  | -0.011683000 | -1.199507000         |                                                                                     |
| 1                               | 1.556144000  | -0.088990000 | -1.454702000         |                                                                                     |
| 1                               | 2.309521000  | -1.603632000 | -0.924515000         |                                                                                     |
| 1                               | 2.473265000  | 1.079372000  | 0.546302000          |                                                                                     |
| 1                               | 3.183868000  | -0.468036000 | 1.121347000          |                                                                                     |
| 7                               | -0.985690000 | -0.903224000 | 0.494378000          |                                                                                     |
| 6                               | -2.145197000 | -0.650867000 | -0.197154000         |                                                                                     |
| 7                               | -2.338478000 | 0.683794000  | -0.576397000         |                                                                                     |
| 6                               | -1.496012000 | 1.681059000  | -0.282051000         |                                                                                     |
| 6                               | -0.365606000 | 1.425720000  | 0.418090000          |                                                                                     |
| 6                               | -0.184745000 | 0.068173000  | 0.756678000          |                                                                                     |
| 7                               | 1.017042000  | -0.312590000 | 1.428807000          |                                                                                     |
| 8                               | -2.972589000 | -1.475856000 | -0.477612000         |                                                                                     |
| 1                               | -1.760499000 | 2.664052000  | -0.635681000         |                                                                                     |
| 1                               | 0.353177000  | 2.191692000  | 0.643726000          |                                                                                     |
| 1                               | 0.958995000  | -1.310806000 | 1.600631000          |                                                                                     |
| 1                               | 1.117885000  | 0.172687000  | 2.312069000          |                                                                                     |
| 1                               | -3.179408000 | 0.853806000  | -1.099632000         |                                                                                     |
| E(RmPW+HF-B95) = -548.408576524 |              |              | N <sub>img</sub> = 1 | 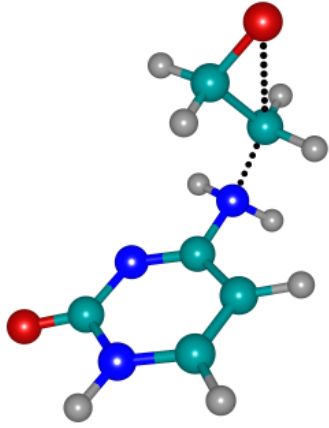 |

**EC-1**

| <b>At. No</b>                   | <b>X</b>     | <b>Y</b>     | <b>Z</b>             |
|---------------------------------|--------------|--------------|----------------------|
| 6                               | 3.218236000  | 0.063425000  | 0.288972000          |
| 6                               | 2.110508000  | -0.600204000 | -0.566058000         |
| 8                               | 4.231191000  | 0.448961000  | -0.392963000         |
| 1                               | 3.395312000  | -0.727735000 | 1.095937000          |
| 1                               | 2.645648000  | 0.863811000  | 0.872871000          |
| 1                               | 2.461081000  | -1.507693000 | -1.043545000         |
| 1                               | 1.701140000  | 0.078654000  | -1.305906000         |
| 7                               | -1.267813000 | -1.010172000 | 0.099633000          |
| 6                               | -2.504884000 | -0.434527000 | -0.085286000         |
| 7                               | -2.510429000 | 0.964815000  | -0.107393000         |
| 6                               | -1.420808000 | 1.730108000  | 0.035035000          |
| 6                               | -0.206778000 | 1.154846000  | 0.215116000          |
| 6                               | -0.241960000 | -0.250754000 | 0.229846000          |
| 7                               | 1.002148000  | -0.968389000 | 0.405104000          |
| 8                               | -3.530965000 | -1.043281000 | -0.218849000         |
| 1                               | -1.565942000 | 2.797358000  | -0.003330000         |
| 1                               | 0.705190000  | 1.715200000  | 0.327714000          |
| 1                               | 0.761761000  | -1.954984000 | 0.378971000          |
| 1                               | 1.417462000  | -0.769343000 | 1.328183000          |
| 1                               | -3.416689000 | 1.378140000  | -0.243554000         |
| E(RmPW+HF-B95) = -548.417156543 |              |              | N <sub>img</sub> = 0 |

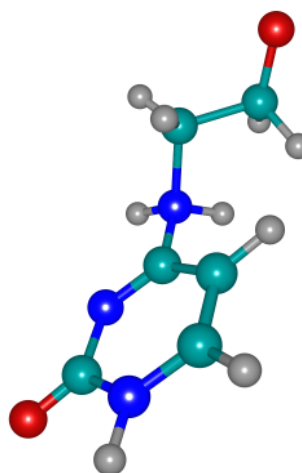

**Table S2.** Zero-point energy (ZPE) corrected SCF energies (E+ZPE), enthalpies (H), free energies (G), ZPE and thermal correction to Gibb's free energy ( $G_{\text{corr}}$ ) computed at MPWB1K/6-31++G(d,p) level of theory. All the energies are given in atomic units (a.u).

| System         | E+ZPE      | H          | G          | ZPE  | $G_{\text{corr}}$ |
|----------------|------------|------------|------------|------|-------------------|
| <b>EAw</b>     | -1078.9889 | -1078.9602 | -1079.0500 | 0.34 | 0.27              |
| <b>EAw-TS1</b> | -1078.9461 | -1078.9198 | -1079.0014 | 0.34 | 0.28              |
| <b>EAw-1</b>   | -1078.9742 | -1078.9484 | -1079.0297 | 0.34 | 0.28              |
| <b>EAw-TS2</b> | -1078.9754 | -1078.9504 | -1079.0292 | 0.33 | 0.28              |
| <b>EAw-2</b>   | -1078.9742 | -1078.9487 | -1079.0285 | 0.33 | 0.28              |
| <b>EAw-TS3</b> | -1078.9756 | -1078.9507 | -1079.0293 | 0.33 | 0.28              |
| <b>EAw-3</b>   | -1079.0187 | -1078.9913 | -1079.0757 | 0.34 | 0.28              |
| <b>EA</b>      | -620.6843  | -620.6719  | -620.7259  | 0.18 | 0.14              |
| <b>EA-TS1</b>  | -620.6012  | -620.5897  | -620.6390  | 0.18 | 0.14              |
| <b>EA-1</b>    | -620.6033  | -620.5917  | -620.6417  | 0.18 | 0.14              |
| <b>EGw</b>     | -1154.2019 | -1154.1721 | -1154.2621 | 0.34 | 0.28              |
| <b>EGw-TS1</b> | -1154.1584 | -1154.1306 | -1154.2157 | 0.34 | 0.28              |
| <b>EGw-1</b>   | -1154.1804 | -1154.1534 | -1154.2370 | 0.34 | 0.28              |
| <b>EGw-TS2</b> | -1154.1782 | -1154.1520 | -1154.2338 | 0.34 | 0.28              |
| <b>EGw-2</b>   | -1154.2352 | -1154.2057 | -1154.2967 | 0.34 | 0.28              |
| <b>EG</b>      | -695.8906  | -695.8770  | -695.9309  | 0.18 | 0.14              |
| <b>EG-TS1</b>  | -695.8028  | -695.7904  | -695.8415  | 0.18 | 0.14              |
| <b>EG-1</b>    | -695.8075  | -695.7951  | -695.8458  | 0.18 | 0.14              |
| <b>ECw</b>     | -1006.6421 | -1006.6135 | -1006.7019 | 0.32 | 0.26              |
| <b>ECw-TS1</b> | -1006.5975 | -1006.5711 | -1006.6531 | 0.32 | 0.27              |
| <b>ECw-1</b>   | -1006.6232 | -1006.5972 | -1006.6788 | 0.32 | 0.27              |
| <b>ECw-TS2</b> | -1006.6232 | -1006.5970 | -1006.6784 | 0.32 | 0.27              |
| <b>ECw-2</b>   | -1006.6610 | -1006.6336 | -1006.7182 | 0.32 | 0.27              |
| <b>EC</b>      | -548.3349  | -548.3239  | -548.3711  | 0.16 | 0.13              |
| <b>EC-TS1</b>  | -548.2458  | -548.2351  | -548.2824  | 0.16 | 0.13              |
| <b>EC-1</b>    | -548.2509  | -548.2429  | -548.2903  | 0.16 | 0.13              |

**Table S3.** Single point SCF energies (in a.u.) of MPWB1K/6-31+G(d,p) optimized geometries at seven different DFT functionals using 6-311++G(3df,2p) basis set.

| System         | MPWB1K     | M05        | B3LYP      | PBE0       | TPSS       | BP86       | PBE        |
|----------------|------------|------------|------------|------------|------------|------------|------------|
| <b>EAw</b>     | -1079.6474 | -1079.5498 | -1080.1939 | -1078.9819 | -1080.2949 | -1080.1993 | -1078.9632 |
| <b>EAw-TS1</b> | -1079.6025 | -1079.4992 | -1080.1603 | -1078.9471 | -1080.2677 | -1080.1751 | -1078.9372 |
| <b>EAw-1</b>   | -1079.6291 | -1079.5175 | -1080.1802 | -1078.9729 | -1080.2818 | -1080.1939 | -1078.9565 |
| <b>EAw-TS2</b> | -1079.6262 | -1079.5133 | -1080.1768 | -1078.9702 | -1080.2782 | -1080.1912 | -1078.9540 |
| <b>EAw-2</b>   | -1079.6260 | -1079.5114 | -1080.1759 | -1078.9697 | -1080.2777 | -1080.1907 | -1078.9533 |
| <b>EAw-TS3</b> | -1079.6257 | -1079.5113 | -1080.1757 | -1078.9699 | -1080.2768 | -1080.1907 | -1078.9534 |
| <b>EAw-3</b>   | -1079.6796 | -1079.5706 | -1080.2233 | -1079.0146 | -1080.3162 | -1080.2273 | -1078.9909 |
| <b>EA</b>      | -621.0334  | -620.9208  | -621.3325  | -620.6290  | -621.4315  | -621.3407  | -620.6079  |
| <b>EA-TS1</b>  | -620.9485  | -620.8366  | -621.2602  | -620.5547  | -621.3650  | -621.2777  | -620.5442  |
| <b>EA-1</b>    | -620.9528  | -620.8381  | -621.2598  | -620.5571  | -621.3624  | -621.2787  | -620.5461  |
| <b>EGw</b>     | -1154.8924 | -1154.7954 | -1155.4636 | -1154.1791 | -1155.5697 | -1155.4715 | -1154.1622 |
| <b>EGw-TS1</b> | -1154.8457 | -1154.7451 | -1155.4295 | -1154.1432 | -1155.5430 | -1155.4487 | -1154.1371 |
| <b>EGw-1</b>   | -1154.8685 | -1154.7588 | -1155.4454 | -1154.1649 | -1155.5539 | -1155.4638 | -1154.1527 |
| <b>EGw-TS2</b> | -1154.8604 | -1154.7498 | -1155.4400 | -1154.1599 | -1155.5488 | -1155.4602 | -1154.1486 |
| <b>EGw-2</b>   | -1154.9252 | -1154.8186 | -1155.4970 | -1154.2138 | -1155.5966 | -1155.5044 | -1154.1938 |
| <b>EG</b>      | -696.2735  | -696.1628  | -696.5985  | -695.8222  | -696.7044  | -696.6114  | -695.8054  |
| <b>EG-TS1</b>  | -696.1832  | -696.0734  | -696.5208  | -695.7429  | -696.6328  | -696.5452  | -695.7381  |
| <b>EG-1</b>    | -696.1903  | -696.0764  | -696.5238  | -695.7480  | -696.6323  | -696.5470  | -695.7407  |
| <b>ECw</b>     | -1007.2725 | -1007.2030 | -1007.7904 | -1006.6576 | -1007.8691 | -1007.7880 | -1006.6404 |
| <b>ECw-TS1</b> | -1007.2241 | -1007.1511 | -1007.7548 | -1006.6202 | -1007.8408 | -1007.7633 | -1006.6132 |
| <b>ECw-1</b>   | -1007.2491 | -1007.1681 | -1007.7723 | -1006.6438 | -1007.8531 | -1007.7797 | -1006.6307 |
| <b>ECw-TS2</b> | -1007.2490 | -1007.1679 | -1007.7721 | -1006.6436 | -1007.8529 | -1007.7795 | -1006.6305 |
| <b>ECw-2</b>   | -1007.2923 | -1007.2139 | -1007.8102 | -1006.6800 | -1007.8841 | -1007.8087 | -1006.6602 |
| <b>EC</b>      | -548.6573  | -548.5746  | -548.9283  | -548.3043  | -549.0069  | -548.9307  | -548.2870  |
| <b>EC-TS1</b>  | -548.5655  | -548.4826  | -548.8490  | -548.2233  | -548.9305  | -548.8631  | -548.2181  |
| <b>EC-1</b>    | -548.5757  | -548.4888  | -548.8549  | -548.2317  | -548.9367  | -548.8681  | -548.2238  |



**Table S4.** Zero-point-energy (ZPE) corrected activation energies ( $E_{\text{act}}$ ) are given with respect to the pre-reactant complex at seven different DFT functionals using 6-311++G(3df,2p) basis set (kcal/mol).

| System         | MPWB1K | M05    | B3LYP  | PBE0   | TPSS   | BP86   | PBE    |
|----------------|--------|--------|--------|--------|--------|--------|--------|
| <b>EAw</b>     | 0.00   | 0.00   | 0.00   | 0.00   | 0.00   | 0.00   | 0.00   |
| <b>EAw-TS1</b> | 28.94  | 32.56  | 21.88  | 22.70  | 17.90  | 16.01  | 17.13  |
| <b>EAw-1</b>   | 11.75  | 20.58  | 8.80   | 5.95   | 8.50   | 3.70   | 4.47   |
| <b>EAw-TS2</b> | 11.54  | 21.17  | 8.96   | 5.64   | 8.77   | 3.40   | 4.06   |
| <b>EAw-2</b>   | 12.59  | 23.26  | 10.43  | 6.86   | 10.02  | 4.62   | 5.42   |
| <b>EAw-TS3</b> | 11.88  | 22.44  | 9.67   | 5.86   | 9.68   | 3.69   | 4.45   |
| <b>EAw-3</b>   | -17.92 | -10.74 | -16.20 | -18.21 | -11.04 | -15.28 | -15.06 |
| <b>EA</b>      | 0.00   | 0.00   | 0.00   | 0.00   | 0.00   | 0.00   | 0.00   |
| <b>EA-TS1</b>  | 53.51  | 53.06  | 45.59  | 46.78  | 41.92  | 39.75  | 40.18  |
| <b>EA-1</b>    | 51.24  | 52.54  | 46.30  | 45.77  | 44.00  | 39.54  | 39.41  |
| <b>EGw</b>     | 0.00   | 0.00   | 0.00   | 0.00   | 0.00   | 0.00   | 0.00   |
| <b>EGw-TS1</b> | 29.12  | 31.40  | 21.19  | 22.37  | 16.59  | 14.16  | 15.54  |
| <b>EGw-1</b>   | 15.52  | 23.53  | 11.98  | 9.47   | 10.47  | 5.38   | 6.46   |
| <b>EGw-TS2</b> | 17.98  | 26.49  | 12.69  | 9.95   | 11.02  | 5.02   | 6.40   |
| <b>EGw-2</b>   | -19.75 | -13.72 | -20.09 | -20.91 | -16.03 | -19.78 | -19.03 |
| <b>EG</b>      | 0.00   | 0.00   | 0.00   | 0.00   | 0.00   | 0.00   | 0.00   |
| <b>EG-TS1</b>  | 55.76  | 55.21  | 47.86  | 48.88  | 44.00  | 40.63  | 41.29  |
| <b>EG-1</b>    | 51.68  | 53.70  | 46.39  | 46.02  | 44.67  | 39.86  | 40.05  |
| <b>ECw</b>     | 0.00   | 0.00   | 0.00   | 0.00   | 0.00   | 0.00   | 0.00   |
| <b>ECw-TS1</b> | 30.28  | 32.46  | 22.27  | 23.37  | 17.64  | 15.40  | 16.97  |
| <b>ECw-1</b>   | 14.73  | 21.95  | 11.42  | 8.71   | 10.06  | 5.23   | 6.13   |
| <b>ECw-TS2</b> | 14.68  | 21.93  | 11.43  | 8.71   | 10.06  | 5.25   | 6.13   |
| <b>ECw-2</b>   | -10.68 | -5.09  | -10.66 | -12.33 | -7.67  | -11.23 | -10.70 |
| <b>EC</b>      | 0.00   | 0.00   | 0.00   | 0.00   | 0.00   | 0.00   | 0.00   |
| <b>EC-TS1</b>  | 56.93  | 57.03  | 49.04  | 50.17  | 47.26  | 41.74  | 42.56  |
| <b>EC-1</b>    | 50.98  | 53.59  | 45.84  | 45.35  | 43.81  | 39.06  | 39.45  |

**Table S5.** Single point MPWB1K-PCM/6-311++G(3df,2p) ZPE corrected SCF energies (in a.u) of MPWB1K/6-31+G(d,p) optimized geometries of reactants, intermediates and transition states of **EAw**, **EGw** and **ECw** systems.

| System         | MPWB1K-PCM |
|----------------|------------|
| <b>EAw</b>     | -1079.3512 |
| <b>EAw-TS1</b> | -1079.3064 |
| <b>EAw-1</b>   | -1079.3429 |
| <b>EAw-TS2</b> | -1079.3395 |
| <b>EAw-2</b>   | -1079.3370 |
| <b>EAw-TS3</b> | -1079.3357 |
| <b>EAw-3</b>   | -1079.3798 |
| <b>EGw</b>     | -1154.6007 |
| <b>EGw-TS1</b> | -1154.5551 |
| <b>EGw-1</b>   | -1154.5829 |
| <b>EGw-TS2</b> | -1154.5782 |
| <b>EGw-2</b>   | -1154.6366 |
| <b>ECw</b>     | -1006.9938 |
| <b>ECw-TS1</b> | -1006.9486 |
| <b>ECw-1</b>   | -1006.9800 |
| <b>ECw-TS2</b> | -1006.9800 |
| <b>ECw-2</b>   | -1007.0148 |

**Figure S1.** Relative energy ( $E_{act}$ ) profiles at seven different DFT functionals using 6-311++G(3df,2p) basis set (kcal/mol). The corresponding numerical values are given in Table S4.

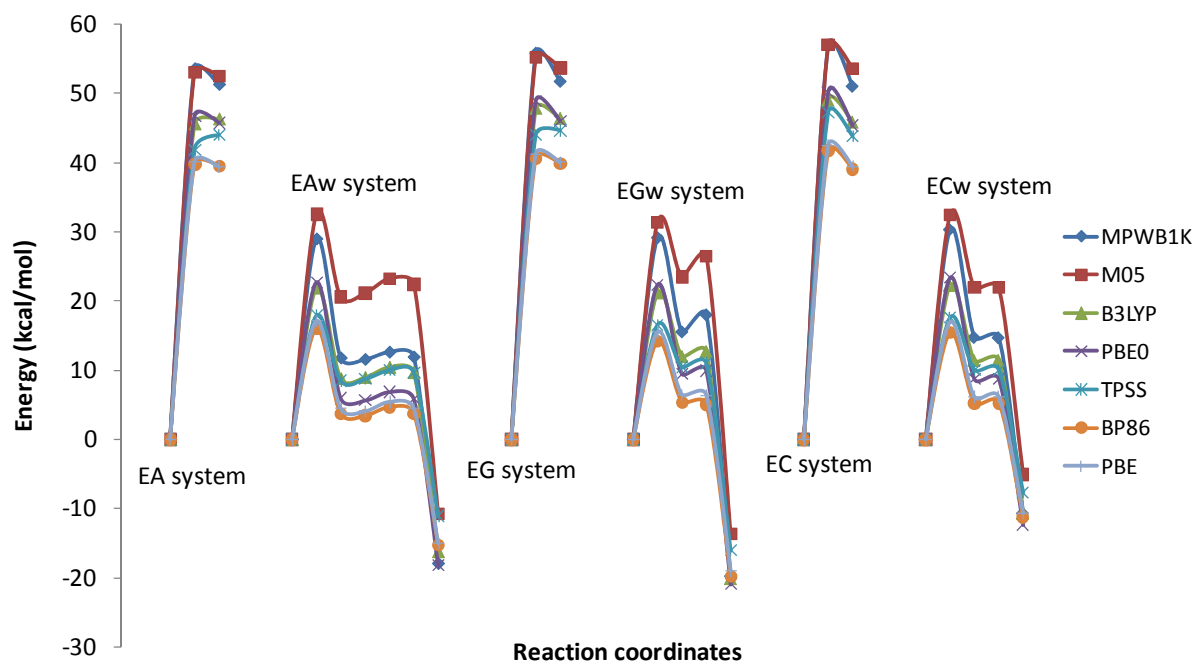

Supplement: c1ob05093a.pdf [file c1ob05093a.pdf]
